# Supplementary material for: A strategy for generating aryl radicals from arylborates through organic photoredox catalysis: photo-Meerwein type arylation of electron-deficient alkenes
Source: Royal Society of Chemistry journal article supplement (doi:10.1039/c7cc09140k), 2018-01-01

## *Supplementary information*

### **A Strategy for Generating Aryl Radicals from Arylborates by Using Organic Photoredox**

#### **Catalysis: Photo-Meerwein Type Arylations of Electron-Deficient Alkenes**

Yutaka Iwata, Yosuke Tanaka, Suzuka Kubosaki, Toshio Morita, Yasuharu Yoshimi\*

Department of Applied Chemistry and Biotechnology, Graduate School of Engineering,  
University of Fukui, 3-9-1 Bunkyo, Fukui 910-8507, Japan

#### **Experimental Section**

All reagents and solvents were used as received from commercial suppliers. IR spectra were recorded on an FT-IR spectrometer. <sup>1</sup>H NMR spectra were recorded in CDCl<sub>3</sub> containing tetramethylsilane as an internal standard, and were acquired on either a 300 or a 500 MHz spectrometer. <sup>13</sup>C NMR spectra were acquired on a 125 MHz spectrometer. High-resolution mass spectra were obtained using FAB mass spectrometer. The light source was a high-pressure (100 W) mercury arcs and 28W blue LED.

#### **General procedures for the photoreaction of arylboronic acids **3** and acrylonitrile **4a****

An aqueous CH<sub>3</sub>CN solution (CH<sub>3</sub>CN 36 mL, H<sub>2</sub>O 4 mL) of arylboronic acids **3** (20 mM), NaOH (20 mM), Phen (10 mM), and DCB (10 mM) in Pyrex vessels (18 mm x 180 mm) was purged with argon for 10 min, and acrylonitrile **4a** (100 mM) was added under argon

atmosphere. The mixture was irradiated with 100 W high-pressure mercury lamp for 6 h, and then the solvent was removed under reduced pressure. The crude product was purified by silica-gel column chromatography using hexane/EtOAc as the eluents to yield adducts **5**. The photoreactions of alkyl- and alkenyl-boronic acids **6** were also carried out similarly.

### Optimization in the photoreaction of phenylboronic acid **3a** with **4a**

The effects of concentration of **4a**, photocatalyst, solvent, and base were investigated in the photoreaction of **3a** with **4a** as shown in Table S1-S3.

Table S1. Effect of concentration of **4a** in the photoreaction of **3a** with **4a**

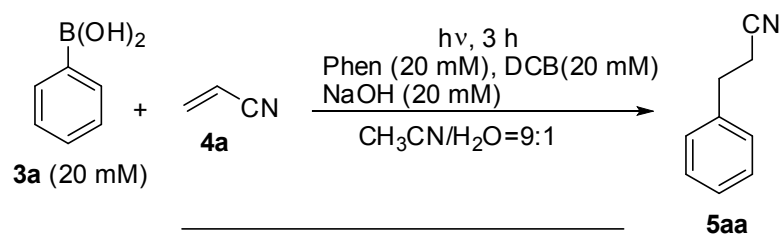

| Entry | <b>4a</b> /mM  | Yield of <b>5aa</b> /% |
|-------|----------------|------------------------|
| 1     | 20 (1 equiv.)  | 37                     |
| 2     | 40 (2 equiv.)  | 51                     |
| 3     | 60 (3 equiv.)  | 57                     |
| 4     | 80 (4 equiv.)  | 66                     |
| 5     | 100 (5 equiv.) | 74                     |
| 6     | 120 (6 equiv.) | 63                     |

Table S2. Effect of photocatalyst in the photoreaction of **3a** with **4a**

| $\mathbf{3a} \text{ (20 mM)} + \mathbf{4a} \text{ (100 mM)} \xrightarrow[\text{CH}_3\text{CN/H}_2\text{O}=9:1]{\text{h}\nu, \text{Arene, Electron-acceptor, NaOH (20 mM)}} \mathbf{5aa}$ |               |                        |                    |                        |
|------------------------------------------------------------------------------------------------------------------------------------------------------------------------------------------|---------------|------------------------|--------------------|------------------------|
| Entry                                                                                                                                                                                    | Arene (mM)    | Electron-acceptor (mM) | Irradiation time/h | Yield of <b>5aa</b> /% |
| 1                                                                                                                                                                                        | Phen (20)     | DCB (20)               | 3                  | 74                     |
| 2                                                                                                                                                                                        | Phen (10)     | DCB (10)               | 6                  | 78                     |
| 3                                                                                                                                                                                        | Phen (5)      | DCB (5)                | 12                 | 64                     |
| 4                                                                                                                                                                                        | Biphenyl (20) | DCN (20)               | 3                  | 48                     |
| 5                                                                                                                                                                                        | Biphenyl (10) | DCN (10)               | 6                  | 41                     |
| 6                                                                                                                                                                                        | Biphenyl (5)  | DCN (5)                | 12                 | 56                     |

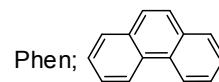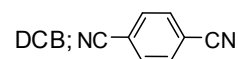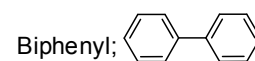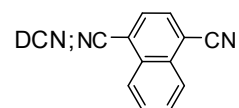

Table S3. Effects of solvent and base in the photoreaction of **3a** with **4a**

| $\text{3a (20 mM) + 4a (100 mM)} \xrightarrow[\text{Solvent}]{\text{h}\nu, 6 \text{ h}} \text{5aa}$ Phen (10 mM), DCB (10 mM)<br>Base (20 mM) |                                                           |                                                |                        |
|-----------------------------------------------------------------------------------------------------------------------------------------------|-----------------------------------------------------------|------------------------------------------------|------------------------|
| Entry                                                                                                                                         | Solvent                                                   | Base                                           | Yield of <b>5aa</b> /% |
| 1                                                                                                                                             | DMF/H <sub>2</sub> O = 9:1                                | NaOH                                           | 26                     |
| 2                                                                                                                                             | DMSO/H <sub>2</sub> O = 9:1                               | NaOH                                           | 11                     |
| 3                                                                                                                                             | EtOH/H <sub>2</sub> O = 9:1                               | NaOH                                           | 25                     |
| 4                                                                                                                                             | MeOH/H <sub>2</sub> O = 9:1                               | NaOH                                           | 49                     |
| 5                                                                                                                                             | CH <sub>3</sub> COCH <sub>3</sub> /H <sub>2</sub> O = 9:1 | NaOH                                           | 66                     |
| 6                                                                                                                                             | CH <sub>3</sub> CN/H <sub>2</sub> O = 9:1                 | NaOH                                           | 78                     |
| 7                                                                                                                                             | CH <sub>3</sub> CN/H <sub>2</sub> O = 8:2                 | NaOH                                           | 66                     |
| 8                                                                                                                                             | CH <sub>3</sub> CN/H <sub>2</sub> O = 7:3                 | NaOH                                           | 41                     |
| 9                                                                                                                                             | CH <sub>3</sub> CN/H <sub>2</sub> O = 9:1                 | LiOH                                           | 39                     |
| 10                                                                                                                                            | CH <sub>3</sub> CN/H <sub>2</sub> O = 9:1                 | KOH                                            | 48                     |
| 11                                                                                                                                            | CH <sub>3</sub> CN/H <sub>2</sub> O = 9:1                 | ( <i>n</i> -Bu) <sub>4</sub> N <sup>+</sup> OH | 21                     |
| 12                                                                                                                                            | CH <sub>3</sub> CN (dry)                                  | ( <i>n</i> -Bu) <sub>4</sub> N <sup>+</sup> OH | 0                      |
| 13                                                                                                                                            | CH <sub>3</sub> CN/H <sub>2</sub> O = 9:1                 | Na <sub>2</sub> CO <sub>3</sub>                | 50                     |
| 14                                                                                                                                            | CH <sub>3</sub> CN/H <sub>2</sub> O = 9:1                 | K <sub>2</sub> CO <sub>3</sub>                 | 59                     |
| 15                                                                                                                                            | CH <sub>3</sub> CN/H <sub>2</sub> O = 9:1                 | Cs <sub>2</sub> CO <sub>3</sub>                | 61                     |
| 16                                                                                                                                            | CH <sub>3</sub> CN/H <sub>2</sub> O = 9:1                 | CH <sub>3</sub> CO <sub>2</sub> Na             | 32                     |

**Characterization data for 5aa–wa, 7aa–ca, 5ab–af, 7bd, 7cd, and 8–11**

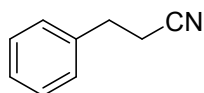

**5aa** Compound **5aa** has been previously reported.<sup>1</sup> Colorless oil, <sup>1</sup>H NMR (300 MHz, CDCl<sub>3</sub>): δ 7.42–7.16 (m, 5H), 2.95 (t, *J* = 7.4 Hz, 2H), 2.61 (t, *J* = 7.4 Hz, 2H); <sup>13</sup>C NMR (125 MHz, CDCl<sub>3</sub>): δ 138.2, 129.0, 128.4, 127.3, 119.3, 31.7, 19.5; GC-MS (*M*<sup>+</sup>) 131.

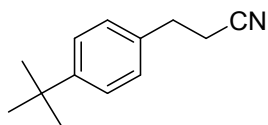

**5fa** Colorless oil, IR (KBr,  $\text{cm}^{-1}$ ) 2964, 2246;  $^1\text{H}$  NMR (300 MHz,  $\text{CDCl}_3$ ):  $\delta$  7.36 (d,  $J = 6.4$  Hz, 2H), 7.16 (d,  $J = 6.4$  Hz, 2H), 2.93 (t,  $J = 7.4$  Hz, 2H), 2.60 (t,  $J = 7.4$  Hz, 2H), 1.31 (s, 9H);  $^{13}\text{C}$  NMR (125 MHz,  $\text{CDCl}_3$ ):  $\delta$  150.2, 135.1, 128.1, 125.9, 119.5, 34.6, 31.4, 31.2, 19.5; HRMS (FAB) calcd for  $(\text{M}+\text{H})^+ \text{C}_{13}\text{H}_{18}\text{N}$ , 188.1439; found, 188.1429.

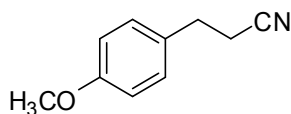

**5ga** Compound **5ga** has been previously reported.<sup>1</sup> Colorless oil,  $^1\text{H}$  NMR (300 MHz,  $\text{CDCl}_3$ ):  $\delta$  7.16 (d,  $J = 8.7$  Hz, 2H), 6.87 (d,  $J = 8.7$  Hz, 2H), 3.80 (s, 3H), 2.90 (t,  $J = 7.3$  Hz, 2H), 2.58 (t,  $J = 7.3$  Hz, 2H);  $^{13}\text{C}$  NMR (125 MHz,  $\text{CDCl}_3$ ):  $\delta$  158.8, 130.2, 129.4, 119.3, 114.3, 55.4, 30.9, 19.8.

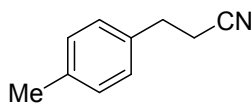

**5ha** Colorless oil, IR (neat,  $\text{cm}^{-1}$ ) 3021, 2925, 2245;  $^1\text{H}$  NMR (500 MHz,  $\text{CDCl}_3$ ):  $\delta$  7.16–7.12 (m, 4H), 2.91 (t,  $J = 7.4$  Hz, 2H), 2.58 (t,  $J = 7.4$  Hz, 2H), 2.34 (s, 3H);  $^{13}\text{C}$  NMR (125 MHz,  $\text{CDCl}_3$ ):  $\delta$  136.9, 135.2, 129.6, 128.3, 119.4, 31.3, 21.2, 19.6; HRMS (FAB) calcd for  $(\text{M}+\text{H})^+ \text{C}_{10}\text{H}_{12}\text{N}$ , 146.0970; found, 146.0965.

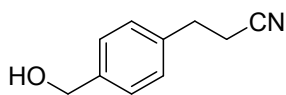

**5ia** White solid, mp 48 °C; IR (KBr,  $\text{cm}^{-1}$ ) 3254, 3199, 2240;  $^1\text{H}$  NMR (300 MHz,  $\text{CDCl}_3$ ):  $\delta$  7.31 (d,  $J = 8.0$  Hz, 2H), 7.20 (d,  $J = 8.0$  Hz, 2H), 4.61 (s, 2H), 2.93 (t,  $J = 7.3$  Hz, 2H), 2.59 (t,  $J = 7.3$  Hz, 2H), 2.44 (s, 1H, OH);  $^{13}\text{C}$  NMR (125 MHz,  $\text{CDCl}_3$ ):  $\delta$  140.1, 137.4, 128.5, 127.6, 119.3, 64.6, 31.2, 19.5; HRMS (FAB) calcd for  $(\text{M}+\text{H})^+ \text{C}_{10}\text{H}_{12}\text{NO}$ , 162.0919; found, 162.0899.

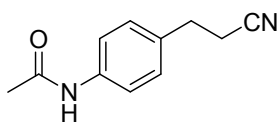

**5ja** White solid, mp 77 °C; IR (KBr,  $\text{cm}^{-1}$ ) 3302, 3172, 2250, 1683;  $^1\text{H}$  NMR (300 MHz,  $\text{CDCl}_3$ ):  $\delta$  7.56 (s, 1H, NH), 7.48 (d,  $J = 8.4$  Hz, 2H), 7.18 (d,  $J = 8.4$  Hz, 2H), 2.92 (t,  $J = 7.3$  Hz, 2H), 2.61 (t,  $J = 7.3$  Hz, 2H), 2.16 (s, 3H);  $^{13}\text{C}$  NMR (125 MHz,  $\text{CDCl}_3$ ):  $\delta$  168.6, 137.2, 133.9, 128.9, 120.4, 119.3, 31.0, 24.6, 19.6; HRMS (FAB) calcd for  $(\text{M}+\text{H})^+ \text{C}_{11}\text{H}_{13}\text{N}_2\text{O}$ , 189.1028; found, 189.1033.

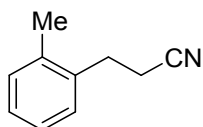

**5ka** Colorless oil; IR (neat,  $\text{cm}^{-1}$ ) 2948, 2246;  $^1\text{H}$  NMR (300 MHz,  $\text{CDCl}_3$ ):  $\delta$  7.19–7.14 (m, 4H), 2.98 (t,  $J = 7.3$  Hz, 2H), 2.58 (t,  $J = 7.3$  Hz, 2H), 2.33 (s, 3H);  $^{13}\text{C}$  NMR (125 MHz,  $\text{CDCl}_3$ ):  $\delta$  136.3, 135.9, 130.6, 128.8, 127.5, 126.6, 119.3, 29.0, 19.3, 18.1; HRMS (FAB) calcd for  $(\text{M}+\text{H})^+ \text{C}_{10}\text{H}_{12}\text{N}$ , 146.0970; found, 146.0954.

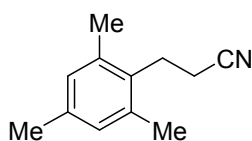

**5la** White solid, mp 82 °C; IR (KBr,  $\text{cm}^{-1}$ ) 2966, 2921, 2240;  $^1\text{H}$  NMR (300 MHz,  $\text{CDCl}_3$ ):  $\delta$  6.79 (s, 2H), 2.93 (t,  $J = 7.5$  Hz, 2H), 2.38 (t,  $J = 7.5$  Hz, 2H), 2.23 (s, 3H), 2.18 (s, 6H);  $^{13}\text{C}$  NMR (125 MHz,  $\text{CDCl}_3$ ):  $\delta$  135.6, 135.0, 130.8, 128.3, 118.4, 24.2, 19.8, 18.7, 15.7; HRMS (FAB) calcd for  $(\text{M}+\text{H})^+ \text{C}_{12}\text{H}_{16}\text{N}$ , 174.1283; found, 174.1270.

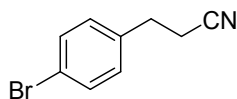

**5na** Compound **5na** has been previously reported.<sup>2</sup> Colorless oil,  $^1\text{H}$  NMR (300 MHz,  $\text{CDCl}_3$ ):  $\delta$  7.47 (d,  $J = 8.4$  Hz, 2H), 7.13 (d,  $J = 8.4$  Hz, 2H), 2.92 (t,  $J = 7.3$  Hz, 2H), 2.61 (t,  $J = 7.3$  Hz, 2H);  $^{13}\text{C}$  NMR (125 MHz,  $\text{CDCl}_3$ ):  $\delta$  137.0, 132.1, 130.1, 121.3, 118.9, 31.1, 19.3.

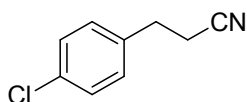

**5ma** Compound **5na** has been previously reported.<sup>1</sup> Colorless oil, <sup>1</sup>H NMR (300 MHz, CDCl<sub>3</sub>): δ 7.31 (d, *J* = 8.3 Hz, 2H), 7.17 (d, *J* = 8.3 Hz, 2H), 2.92 (t, *J* = 7.3 Hz, 2H), 2.60 (t, *J* = 7.3 Hz, 2H); <sup>13</sup>C NMR (125 MHz, CDCl<sub>3</sub>): δ 136.7, 133.1, 129.9, 129.1, 119.1, 30.9, 19.3.

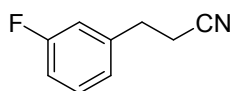

**5oa** Compound **5oa** has been previously reported.<sup>1</sup> Colorless oil, <sup>1</sup>H NMR (300 MHz, CDCl<sub>3</sub>): δ 7.34–7.26 (m, 1H), 7.03–6.92 (m, 3H), 2.95 (t, *J* = 7.3 Hz, 2H), 2.62 (t, *J* = 7.3 Hz, 2H); <sup>13</sup>C NMR (125 MHz, CDCl<sub>3</sub>): δ 163.0 (d, *J* = 250.3 Hz), 140.5 (d, *J* = 7.3 Hz), 130.5 (d, *J* = 8.3 Hz), 124.1 (d, *J* = 3.0 Hz), 118.9, 115.4 (d, *J* = 21.3 Hz), 114.3 (d, *J* = 21.0 Hz), 31.3, 19.2.

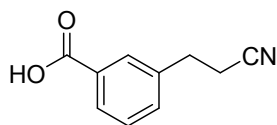

**5pa** White solid, mp 155 °C; IR (KBr, cm<sup>-1</sup>) 3627, 3067, 2921, 2250, 1679; <sup>1</sup>H NMR (500 MHz, CDCl<sub>3</sub>): δ 8.03 (d, *J* = 6.9 Hz, 1H), 7.97 (s, 1H), 7.51–7.46 (m, 2H), 3.03 (t, *J* = 7.4 Hz, 2H), 2.67 (t, *J* = 7.4 Hz, 2H) <sup>13</sup>C NMR (125 MHz, CDCl<sub>3</sub>): δ 171.6, 138.5, 134.0, 130.0, 129.3, 118.8, 31.4, 19.3; HRMS (FAB) calcd for (M+H)<sup>+</sup> C<sub>10</sub>H<sub>10</sub>NO<sub>2</sub>, 176.0712; found, 176.0706.

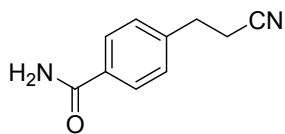

**5qa** White solid, mp 128 °C; IR (KBr, cm<sup>-1</sup>) 3291, 3136, 2929, 2242, 1661, 1609; <sup>1</sup>H NMR (300 MHz, CDCl<sub>3</sub>): δ 7.80 (d, *J* = 8.0 Hz, 2H), 7.33 (d, *J* = 8.0 Hz, 2H), 6.17 (brs, 1H, NH), 5.93 (brs, 1H, NH), 3.02 (t, *J* = 7.2 Hz, 2H), 2.66 (t, *J* = 7.2 Hz, 2H); <sup>13</sup>C NMR (125 MHz, CDCl<sub>3</sub>) δ 169.0, 142.2, 132.5, 128.7, 128.1, 118.8, 31.4, 19.2; HRMS (FAB) calcd for (M+H)<sup>+</sup> C<sub>10</sub>H<sub>11</sub>N<sub>2</sub>O, 175.0871; found, 175.0901.

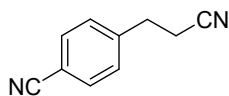

**5ra** Compound **5ra** has been previously reported.<sup>3</sup> White solid, <sup>1</sup>H NMR (300 MHz, CDCl<sub>3</sub>): δ 7.65 (d, *J* = 8.2 Hz, 2H), 7.37 (d, *J* = 8.2 Hz, 2H), 3.03 (t, *J* = 7.2 Hz, 2H), 2.70 (t, *J* = 7.2 Hz, 2H); <sup>13</sup>C NMR (125 MHz, CDCl<sub>3</sub>): δ 143.3, 132.8, 129.3, 118.6, 118.5, 111.5, 31.6, 19.0.

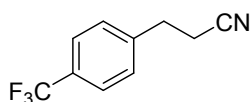

**5sa** Compound **5sa** has been previously reported.<sup>3</sup> Colorless oil, <sup>1</sup>H NMR (500 MHz, CDCl<sub>3</sub>): δ 7.60 (d, *J* = 7.7 Hz, 2H), 7.35 (d, *J* = 7.7 Hz, 2H), 3.01 (t, *J* = 7.3 Hz, 2H), 2.64 (t, *J* = 7.3 Hz, 2H) <sup>13</sup>C NMR (125 MHz, CDCl<sub>3</sub>): δ 142.0, 129.5 (q, *J* = 32 Hz), 128.8, 126.0, 126.0, 124.1 (q, *J* = 270 Hz), 118.7, 31.4, 19.2.

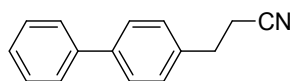

**5ta** Compound **5ta** has been previously reported.<sup>4</sup> White solid, <sup>1</sup>H NMR (300 MHz, CDCl<sub>3</sub>): δ 7.59–7.54 (m, 4H), 7.46–7.40 (m, 2H), 7.37–7.28 (m, 3H), 2.98 (t, *J* = 7.4 Hz, 2H), 2.63 (t, *J* = 7.4 Hz, 2H); <sup>13</sup>C NMR (125 MHz, CDCl<sub>3</sub>): δ 140.7, 140.3, 137.2, 128.9, 128.8, 127.7, 127.5, 127.2, 119.3, 31.3, 19.5.

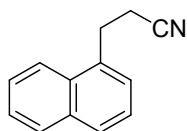

**5ua** Compound **5ua** has been previously reported.<sup>5</sup> Colorless oil, <sup>1</sup>H NMR (300 MHz, CDCl<sub>3</sub>): δ 7.93–7.88 (m, 2H), 7.80 (d, *J* = 7.9 Hz, 1H), 7.59–7.49 (m, 2H), 7.47–7.39 (m, 2H), 3.44 (t, *J* = 7.5 Hz, 2H), 2.76 (t, *J* = 7.5 Hz, 2H); <sup>13</sup>C NMR (125 MHz, CDCl<sub>3</sub>): δ 134.1, 134.0, 131.2, 129.3, 128.2, 126.7, 126.0, 125.7, 122.7, 119.3, 28.9, 18.6.

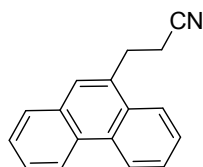

**5va** Compound **5va** has been previously reported.<sup>6</sup> White solid, <sup>1</sup>H NMR (300 MHz, CDCl<sub>3</sub>): δ 8.79–8.76 (m, 1H), 8.67 (d, *J* = 8.2 Hz, 1H), 8.00–7.97 (m, 1H), 7.89–7.86 (m, 1H), 7.72–7.61 (m, 5H), 3.51 (t, *J* = 7.5 Hz, 2H), 2.85 (t, *J* = 7.5 Hz, 2H); <sup>13</sup>C NMR



(150 MHz, CDCl<sub>3</sub>):  $\delta$  132.0, 131.4, 130.9, 130.1, 130.0, 128.5, 127.2, 127.1, 127.0, 126.8, 126.7, 123.7, 123.3, 122.5, 119.2, 29.3, 18.1.

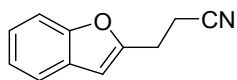

**5wa** Colorless oil, IR (neat, cm<sup>-1</sup>) 2966, 2925, 2248; <sup>1</sup>H NMR (300 MHz, CDCl<sub>3</sub>):  $\delta$  7.73–7.63 (m, 2H), 7.31–7.23 (m, 2H), 7.09 (s, 1H), 3.20 (t, *J* = 7.3 Hz, 2H), 2.70 (t, *J* = 7.3 Hz, 2H); <sup>13</sup>C NMR (125 MHz, CDCl<sub>3</sub>):  $\delta$  140.8, 139.8, 139.4, 124.5, 124.3, 123.3, 122.4, 122.3, 118.6, 26.9, 19.3; HRMS (FAB) calcd for (M+H)<sup>+</sup> C<sub>11</sub>H<sub>10</sub>NO, 172.0762; found, 172.0782.

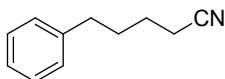

**7aa** Compound **7aa** has been previously reported.<sup>1</sup> Colorless oil, <sup>1</sup>H NMR (300 MHz, CDCl<sub>3</sub>):  $\delta$  7.32–7.26 (m, 2H), 7.23–7.16 (m, 3H), 2.66 (t, *J* = 7.3 Hz, 2H), 2.35 (t, *J* = 7.3 Hz, 2H), 1.85–1.63 (m, 4H); <sup>13</sup>C NMR (150 MHz, CDCl<sub>3</sub>):  $\delta$  141.3, 128.6, 128.5, 126.2, 119.7, 35.1, 30.4, 24.9, 17.2.

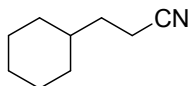

**7ba** Compound **7ba** has been previously reported.<sup>7</sup> Colorless oil, <sup>1</sup>H NMR (300 MHz, CDCl<sub>3</sub>):  $\delta$  2.35 (t, *J* = 7.4 Hz, 2H), 1.74–1.70 (m, 4H), 1.55 (q, *J* = 7.2 Hz, 2H), 1.43–1.34 (m, 1H), 1.32–1.12 (m, 3H), 0.96–0.84 (m, 2H); <sup>13</sup>C NMR (125 MHz, CDCl<sub>3</sub>):  $\delta$  120.2, 36.7, 32.6, 32.6, 26.4, 26.0, 14.7.

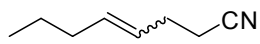

(E/Z mixture) **7ca** Compound **7ca** has been previously reported.<sup>8</sup> Colorless oil, <sup>1</sup>H NMR (500 MHz, CDCl<sub>3</sub>):  $\delta$  5.61–5.54 (m, 1H), 5.45–5.37 (m, 1H), 2.41–2.31 (m, 4H), 2.06–1.98 (m, 2H), 1.44–1.35 (m, 2H), 0.94–0.88 (m, 3H); <sup>13</sup>C NMR (125 MHz, CDCl<sub>3</sub>):  $\delta$  134.1, 133.6, 125.8, 125.2, 119.5, 34.6, 29.4, 28.5, 23.3, 22.7, 22.4, 17.8, 17.7, 13.8, 13.7.

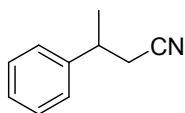

**5ab** Compound **5ab** has been previously reported.<sup>9</sup> Colorless oil, <sup>1</sup>H NMR

(300 MHz, CDCl<sub>3</sub>):  $\delta$  7.40–7.23 (m, 5H), 3.23–3.113 (m, 1H), 2.66–2.51 (m, 2H), 1.46 (d,  $J$  = 7.0 Hz, 3H); <sup>13</sup>C NMR (125 MHz, CDCl<sub>3</sub>):  $\delta$  143.2, 129.0, 127.4, 126.7, 118.7, 36.6, 26.5, 20.8.

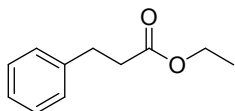

**5ac** Compound **5ac** has been previously reported.<sup>3</sup> Colorless oil, <sup>1</sup>H NMR (500 MHz, CDCl<sub>3</sub>):  $\delta$  7.28 (t,  $J$  = 7.4 Hz, 2H), 7.20–7.18 (m, 3H), 4.12 (q,  $J$  = 7.3 Hz, 2H), 2.94 (t,  $J$  = 7.7 Hz, 2H), 2.61 (t,  $J$  = 7.7 Hz, 2H), 1.22 (t,  $J$  = 7.3 Hz, 3H); <sup>13</sup>C NMR (125 MHz, CDCl<sub>3</sub>):  $\delta$  173.0, 140.7, 128.6, 128.4, 126.3, 60.5, 36.1, 31.1, 14.3.

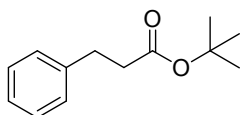

**5ad** Compound **5ad** has been previously reported.<sup>10</sup> Colorless oil, <sup>1</sup>H NMR (300 MHz, CDCl<sub>3</sub>):  $\delta$  7.24–7.19 (m, 2H), 7.14–7.12 (m, 3H), 2.84 (t,  $J$  = 7.5 Hz, 2H), 2.45 (t,  $J$  = 7.5 Hz, 2H), 1.35 (s, 9H); <sup>13</sup>C NMR (125 MHz, CDCl<sub>3</sub>):  $\delta$  172.4, 140.9, 128.5, 128.4, 126.2, 80.4, 37.2, 31.2, 28.2.

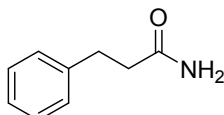

**5ae** Compound **5ae** has been previously reported.<sup>11</sup> White solid, <sup>1</sup>H NMR (300 MHz, CDCl<sub>3</sub>):  $\delta$  7.33–7.19 (m, 5H), 5.36 (brs, 2H, NH<sub>2</sub>), 2.98 (t,  $J$  = 7.8 Hz, 2H), 2.54 (t,  $J$  = 7.8 Hz, 2H); <sup>13</sup>C NMR (150 MHz, CDCl<sub>3</sub>):  $\delta$  174.4, 140.7, 128.7, 128.4, 126.4, 37.6, 31.5.

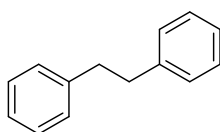

**5af** Compound **5af** has been previously reported.<sup>9</sup> Colorless oil, <sup>1</sup>H NMR (300 MHz, CDCl<sub>3</sub>):  $\delta$  7.20–7.06 (m, 10H), 2.82 (s, 4H); <sup>13</sup>C NMR (150 MHz, CDCl<sub>3</sub>):  $\delta$  142.0, 128.7, 128.6, 126.2, 38.2.

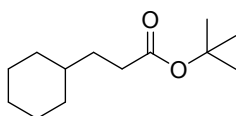

**7bd** Compound **7bd** has been previously reported.<sup>12</sup> Colorless oil, <sup>1</sup>H NMR (300 MHz, CDCl<sub>3</sub>):  $\delta$  2.21 (t,  $J$  = 7.9 Hz, 2H), 1.71–1.68 (m, 5H), 1.51–1.40 (m, 12H),

1.23–1.17 (m, 3H), 0.93–0.83 (m, 2H);  $^{13}\text{C}$  NMR (125 MHz,  $\text{CDCl}_3$ ):  $\delta$  173.7, 79.9, 37.3, 33.3, 33.2, 33.1, 33.0, 32.6, 28.2, 28.1, 26.7, 26.6, 26.4, 26.3.

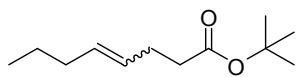

**7cd** Compound **7cd** has been previously reported.<sup>12</sup> Colorless oil,  $^1\text{H}$  NMR (500 MHz,  $\text{CDCl}_3$ ):  $\delta$  5.45–5.36 (m, 2H), 2.31–2.25 (m, 4H), 2.02–1.91 (m, 2H), 1.42 (s, 9H), 1.39–1.30 (m, 2H), 0.90–0.85 (m, 3H)  $^{13}\text{C}$  NMR (125 MHz,  $\text{CDCl}_3$ ):  $\delta$  172.8, 131.4, 131.1, 128.4, 127.9, 80.1, 35.7, 34.7, 29.3, 28.2, 23.1, 22.8, 22.7, 13.9, 13.7.

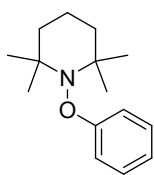

**8** Compound **8** has been previously reported.<sup>13</sup> Colorless oil,  $^1\text{H}$  NMR (300 MHz,  $\text{CDCl}_3$ ):  $\delta$  7.23–7.16 (m, 4H), 6.86–6.81 (m, 1H), 1.69–1.53 (m, 5H), 1.44–1.39 (m, 1H), 1.23 (s, 6H), 1.01 (s, 6H);  $^{13}\text{C}$  NMR (150 MHz,  $\text{CDCl}_3$ ):  $\delta$  163.7, 128.8, 119.9, 114.0, 60.4, 39.9, 32.7, 20.5, 17.1; GC-MS ( $\text{M}^+$ ) 233.

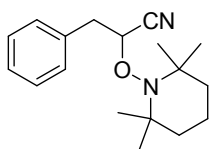

**9** Compound **9** has been previously reported.<sup>14</sup> Colorless oil,  $^1\text{H}$  NMR (300 MHz,  $\text{CDCl}_3$ ):  $\delta$  7.36–7.25 (m, 5H), 4.79 (t,  $J = 6.7$  Hz, 1H), 3.21–3.11 (m, 2H), 1.59–1.38 (m, 5H), 1.34–1.27 (m, 4H), 1.12–1.06 (m, 9H);  $^{13}\text{C}$  NMR (125 MHz,  $\text{CDCl}_3$ ):  $\delta$  134.8, 129.9, 128.6, 127.5, 119.3, 75.1, 61.1, 60.0, 40.1, 40.0, 39.5, 34.1, 33.7, 20.6, 20.4, 17.1; GC-MS ( $\text{M}^+$ ) 286.

## References

- (1) Anxionnat, B.; Pardo, D. G.; Ricci, G.; Cossy, J. *Org. Lett.* **2011**, *13*, 4084–4087.
- (2) Parham, W. E.; Jones, L. D. *J. Org. Chem.* **1976**, *41*, 1187–1191.
- (3) Amatore, M.; Gosmini, C.; Périchon, J. *J. Org. Chem.* **2006**, *71*, 6130–6134.
- (4) Wang, J.; Burdzinski, G.; Gustafson, T. L.; Platz, M. S. *J. Org. Chem.* **2006**, *71*, 6221–6228.
- (5) Gardner, R. A.; Delcros, J.-G.; Konate, F.; Breitbeil, F.; Martin, B.; Sigman, M.; Phanstiel, O. *J. Med. Chem.* **2004**, *47*, 6055–6069.

- (6) Rhodes, R. A.; Boykin, D. W. *Syn. Commun.* **1988**, *18*, 681–687.
- (7) Cardarely, A.; Fagnoni, M.; Mella, M.; Albini, A. *J. Org. Chem.* **2001**, *66*, 7320–7327.
- (8) Bosma, R. H. A.; Van Den Aardweg, G. C. N.; Mol, J. C. *J. Organomet. Chem.* **1985**, *280*, 115–122.
- (9) Black, P. J.; Edwards, M. G.; Williams, J. M. J. *Eur. J. Org. Chem.* **2006**, *19*, 4367–4378.
- (10) Iuchi, Y.; Obora, Y.; Ishii, Y. *J. Am. Chem. Soc.* **2010**, *132*, 2536–2537.
- (11) Ohmura, R.; Takahata, M.; Togo, H. *Tetrahedron Lett.* **2010**, *51*, 4378–4381.
- (12) Gansäuer, A.; Fan, C.-A.; Keller, F.; Keil, J. *J. Am. Chem. Soc.* **2007**, *129*, 3484–3485.
- (13) Hartmann, M.; Li, Y.; Studer, A. *J. Am. Chem. Soc.* **2012**, *134*, 16516–16519.
- (14) Heinrich, M. R.; Kirschstein, M. D. *Tetrahedron Lett.* **2006**, *47*, 2115–2118.
- (15) Schenkel, L. B.; Olivieri, P. R.; Boezio, A. A.; Deak, H. L.; Emkey, R.; Graceffa, R. F.; Gunaydin, H.; Guzman-Perez, A.; Lee, J. H.; Teffera, Y.; Wang, W.; Youngblood, B. D.; Yu, V. L.; Zhang, M.; Gavva, N. R.; Lehto, S. G.; Geuns-Meyer, S. *J. Med. Chem.* **2016**, *59*, 2794–2809.

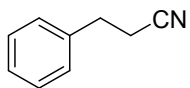

5aa

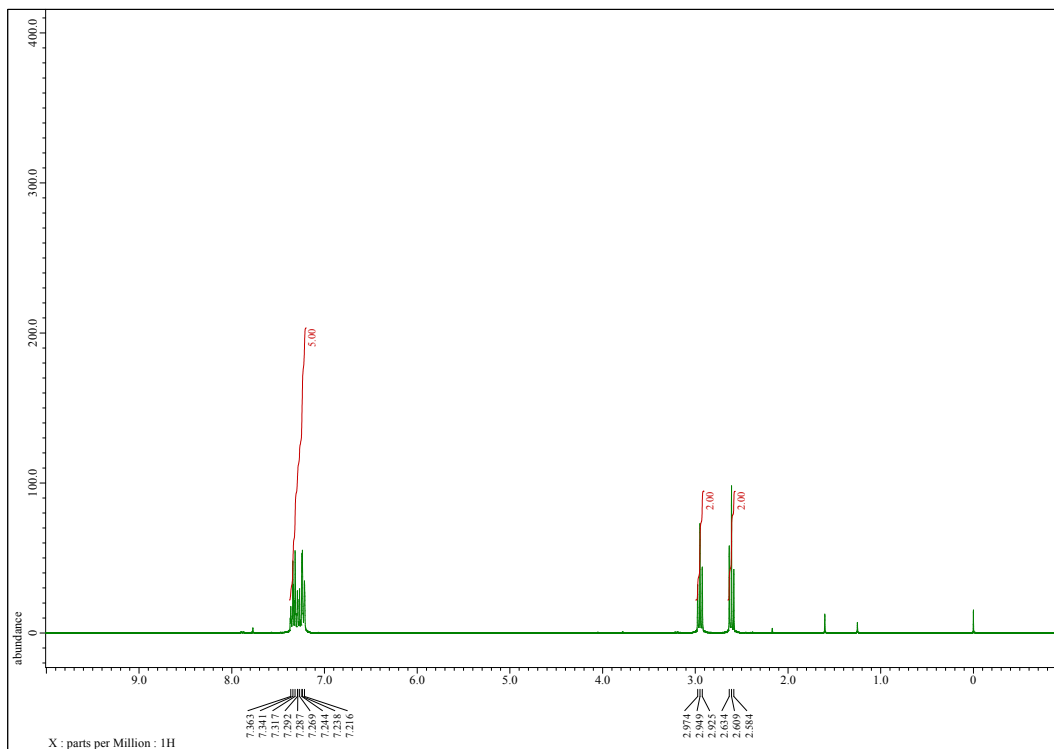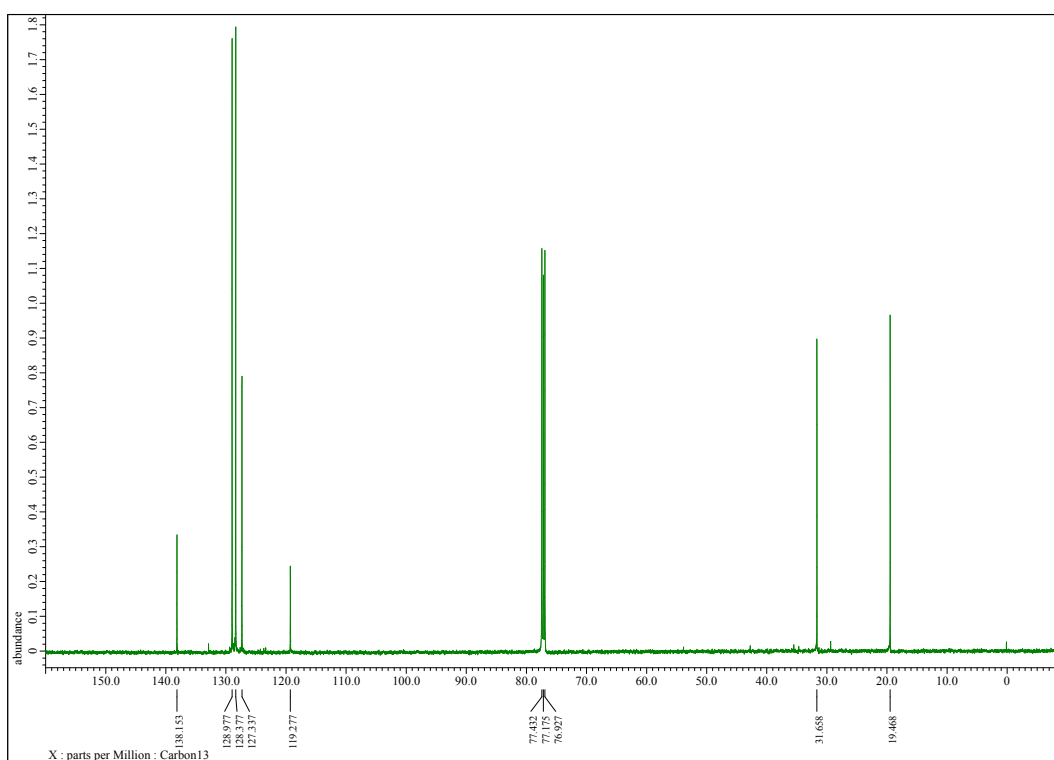

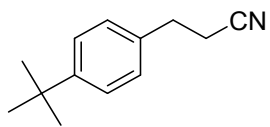

5fa

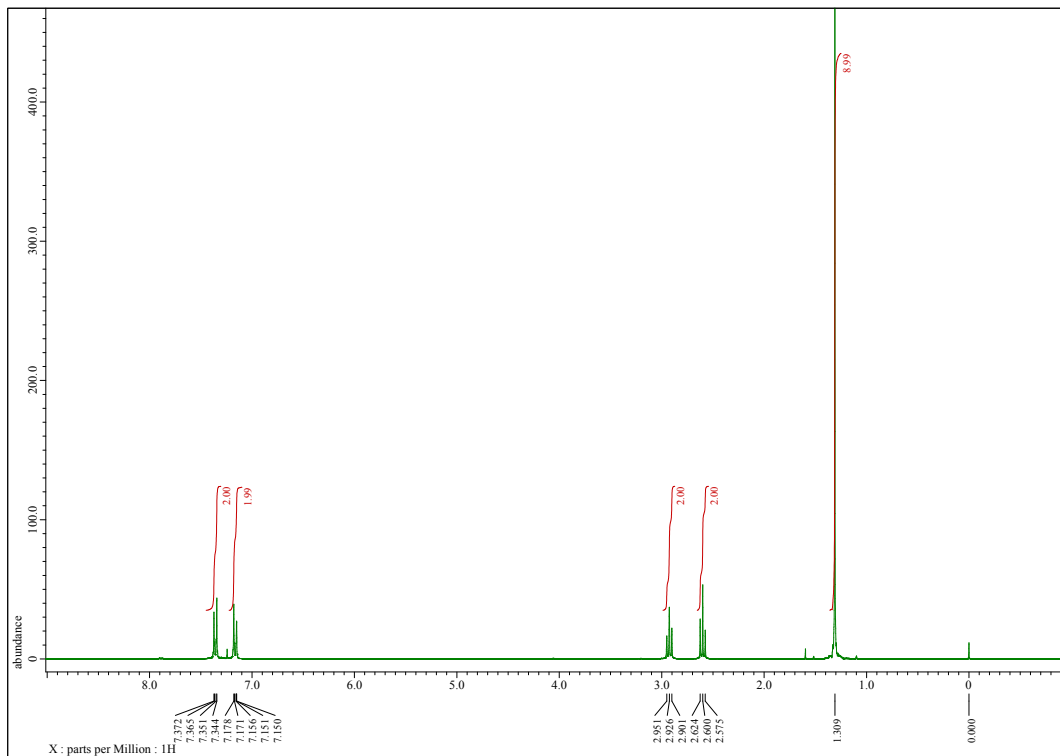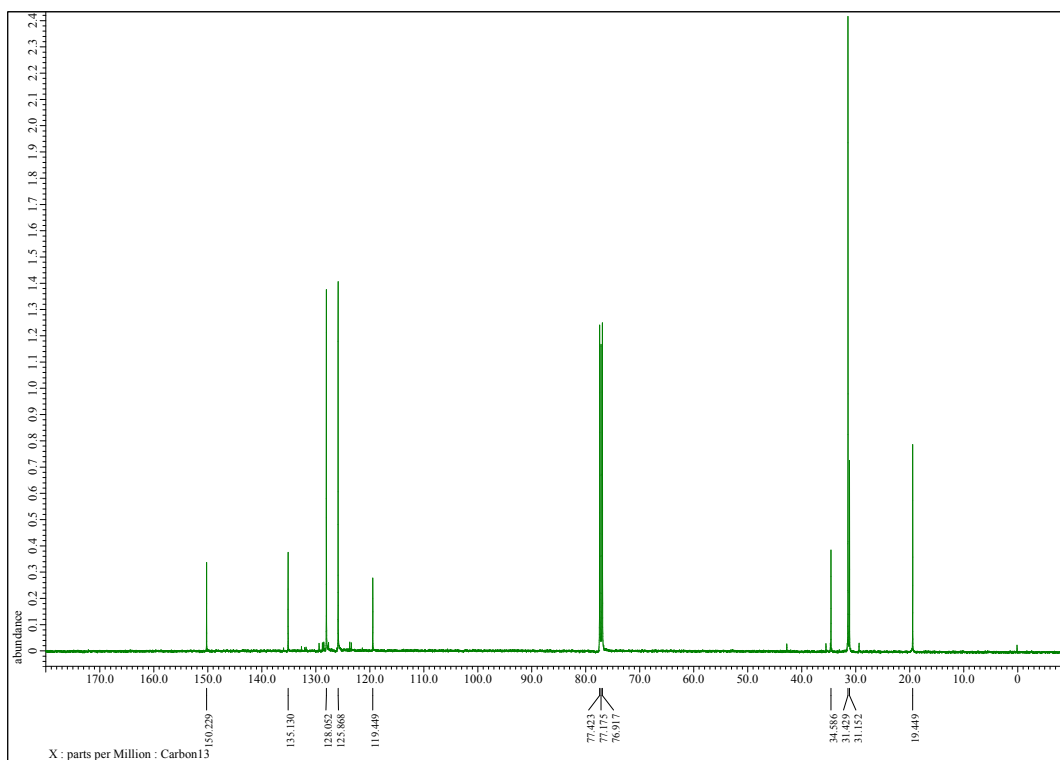

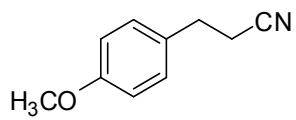

5ga

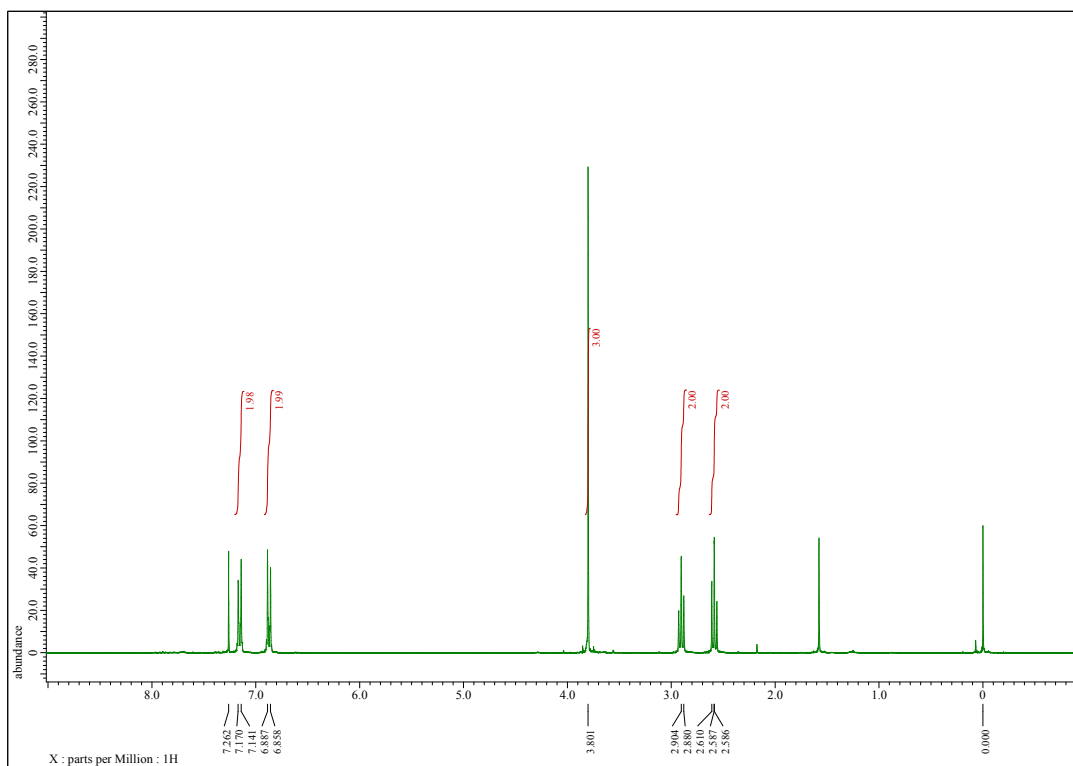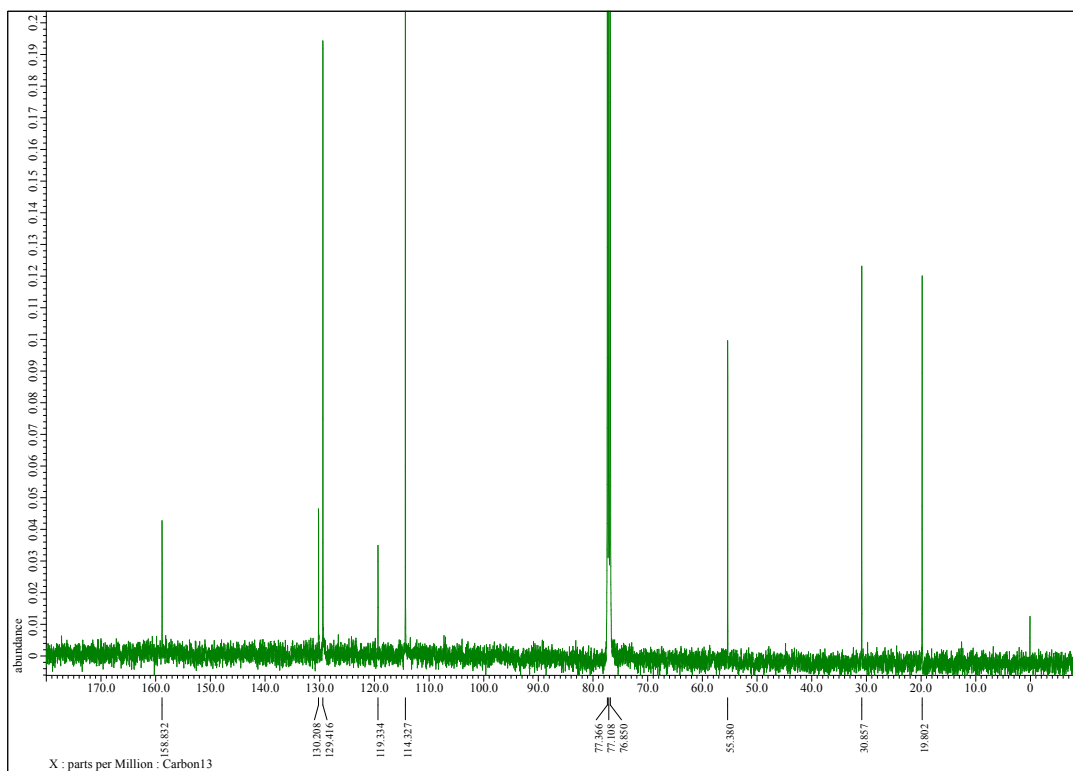

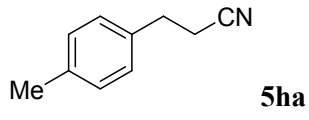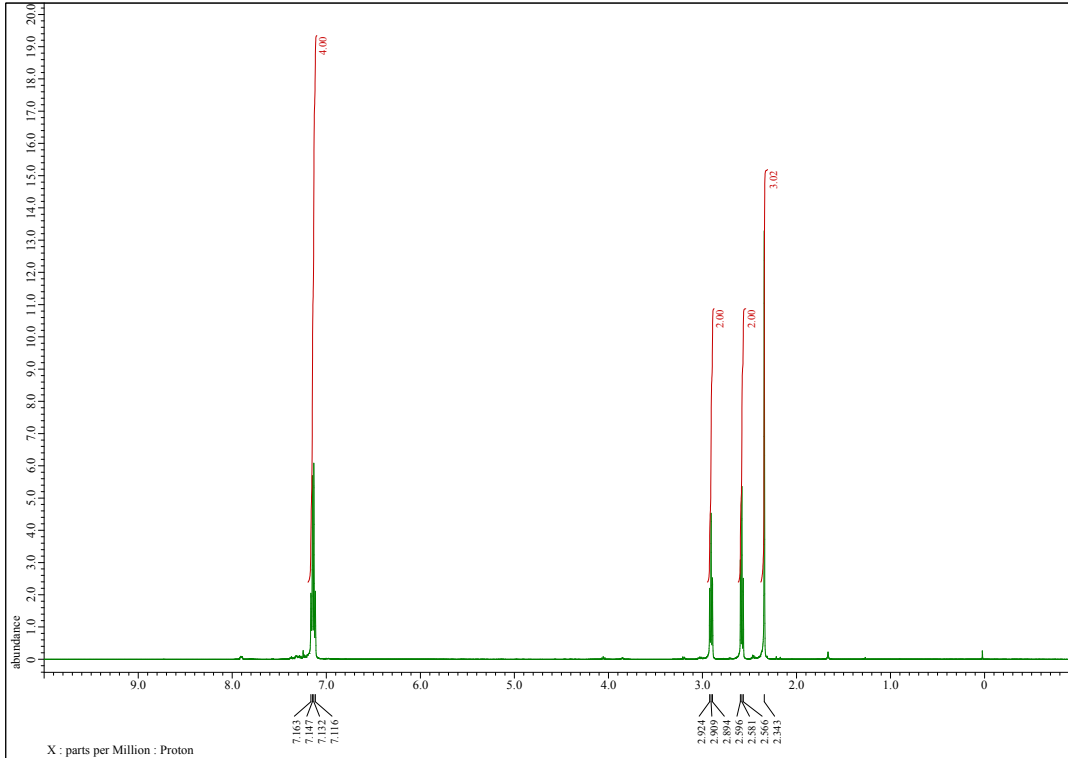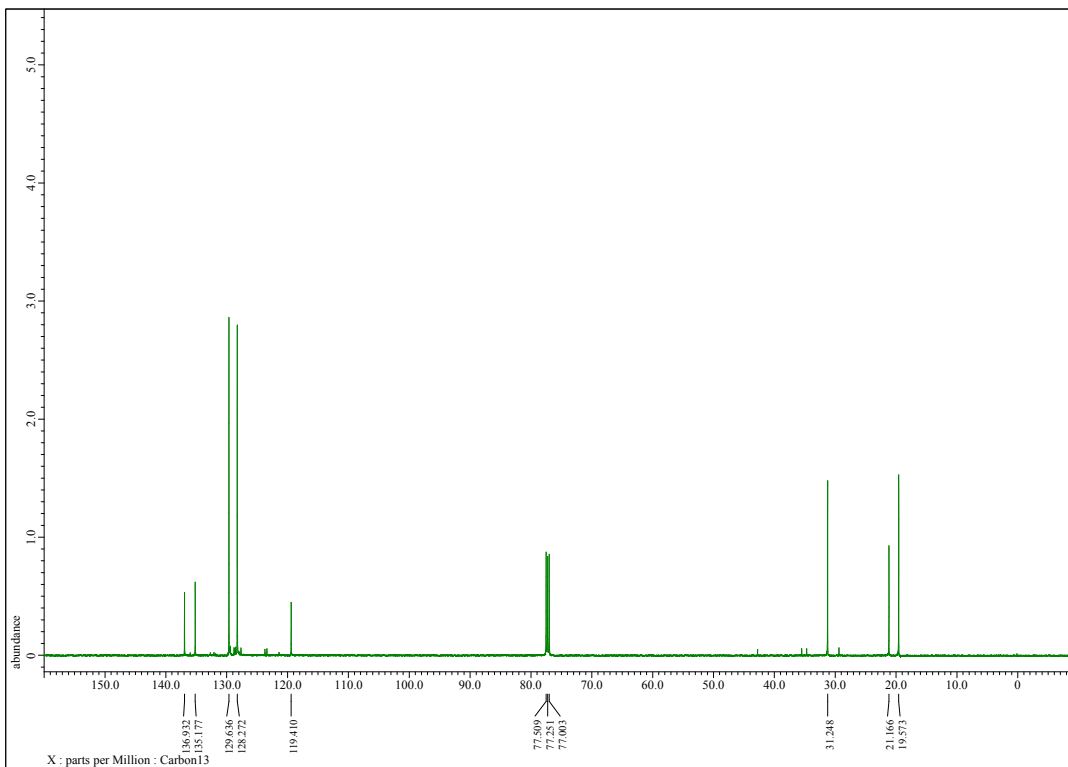



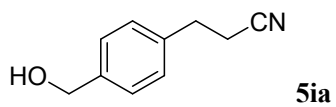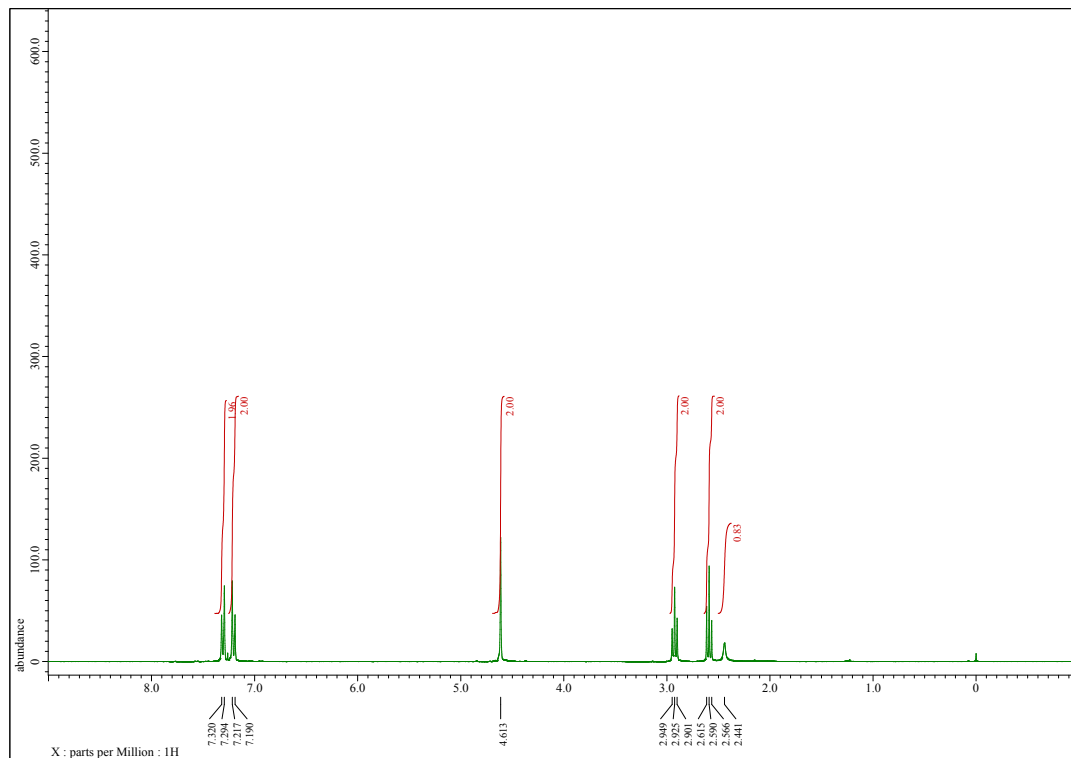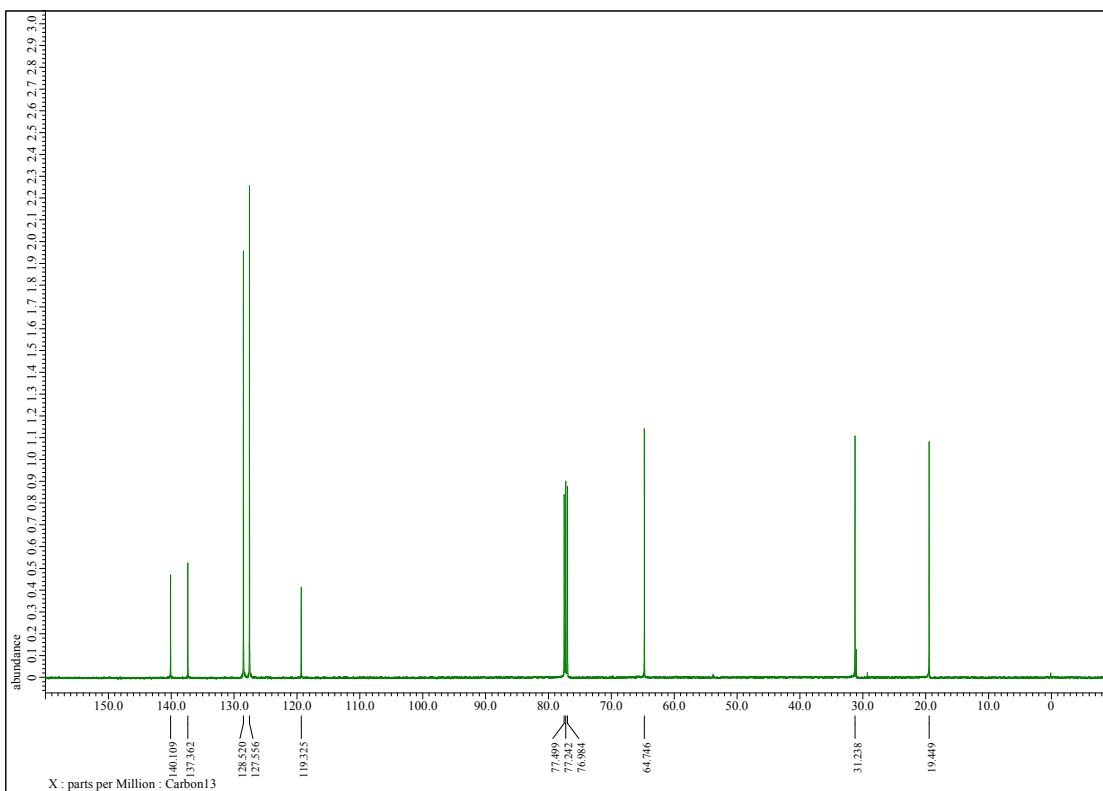

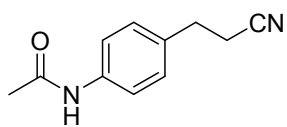

5ja

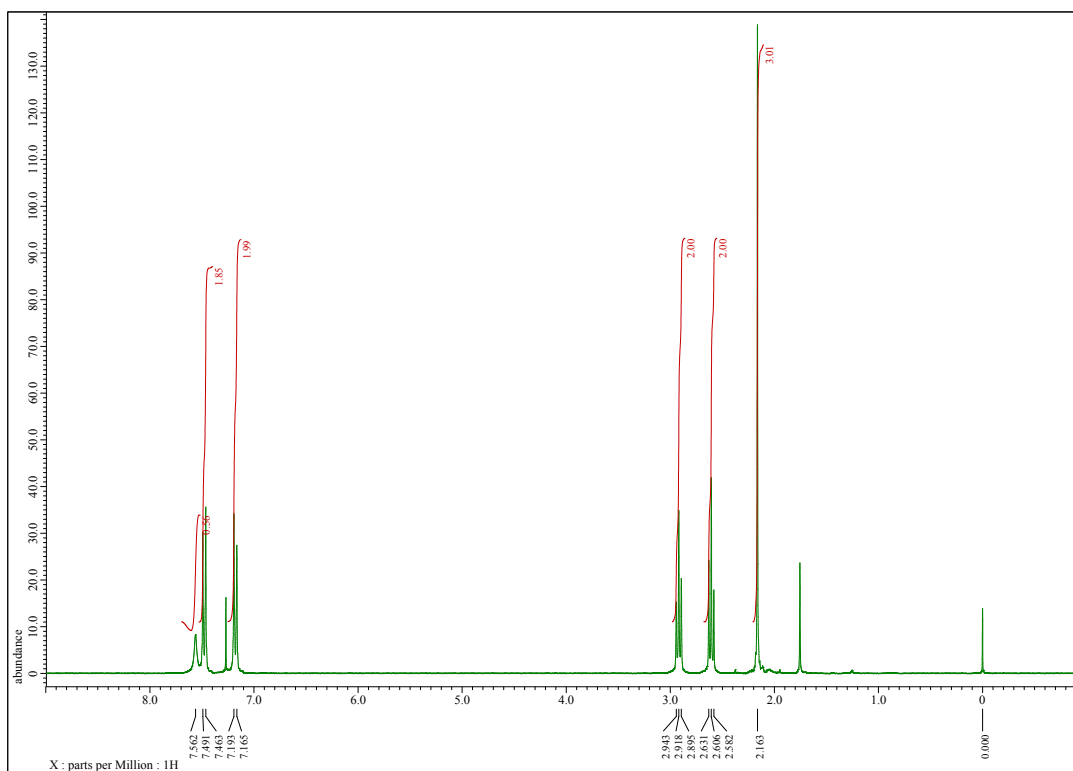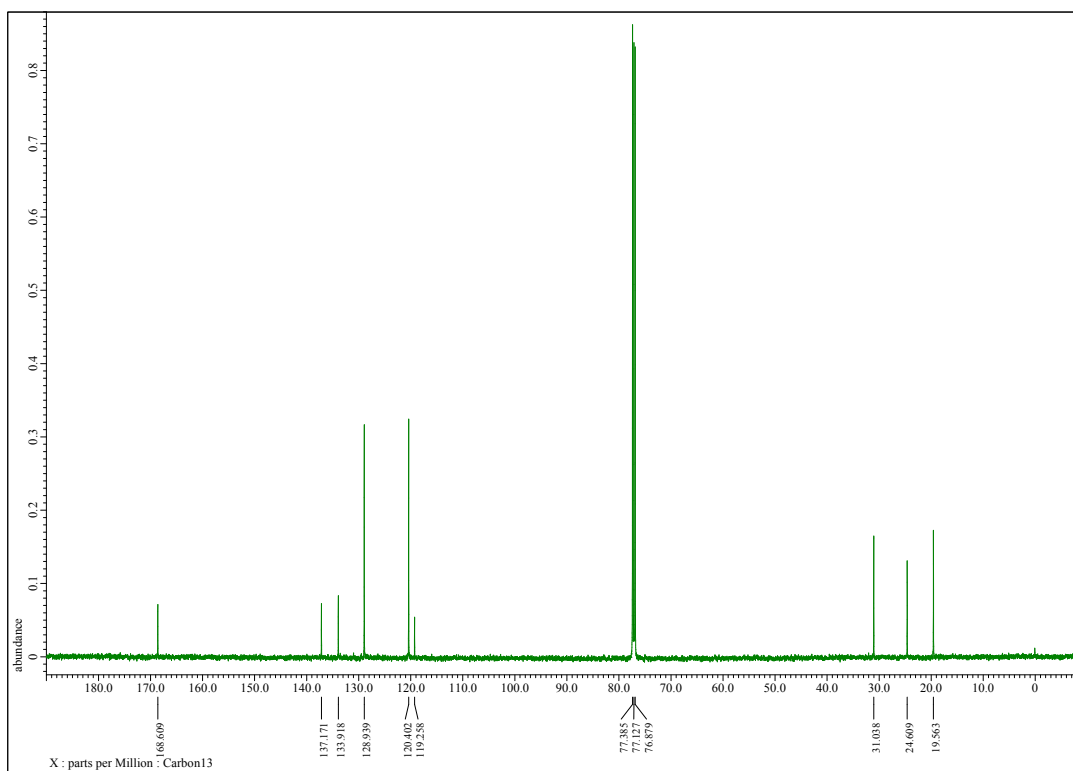

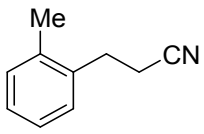

5ka

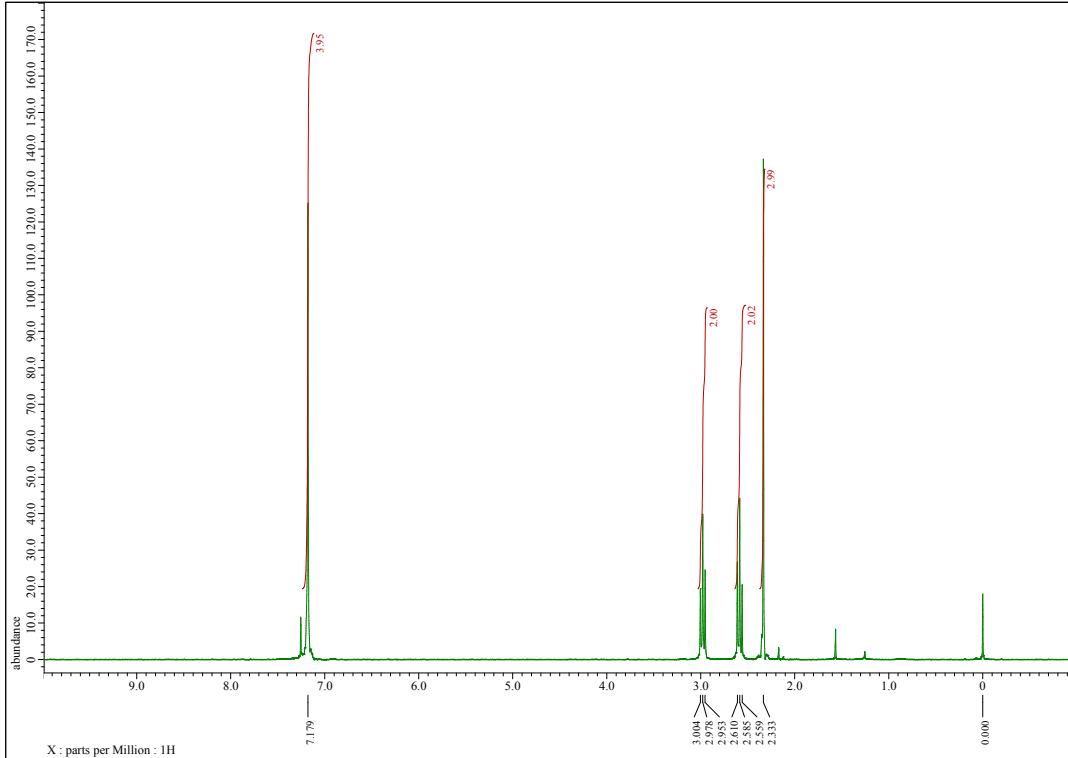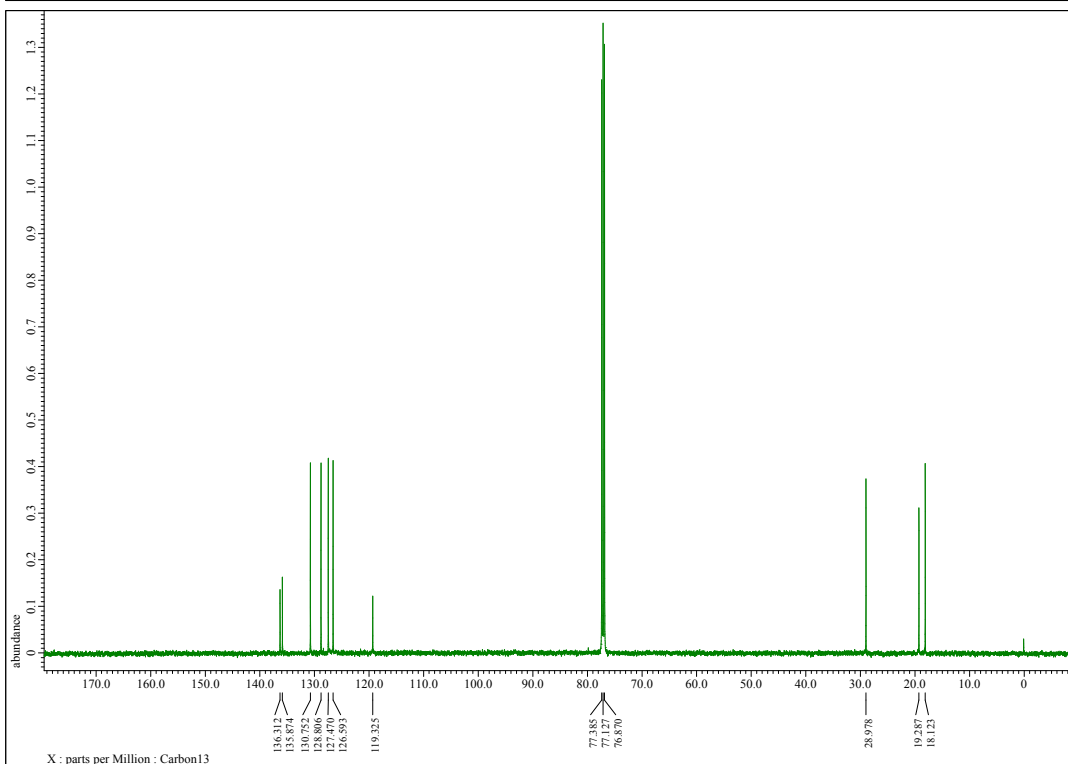

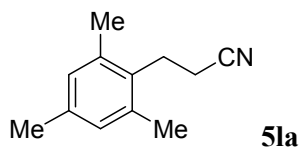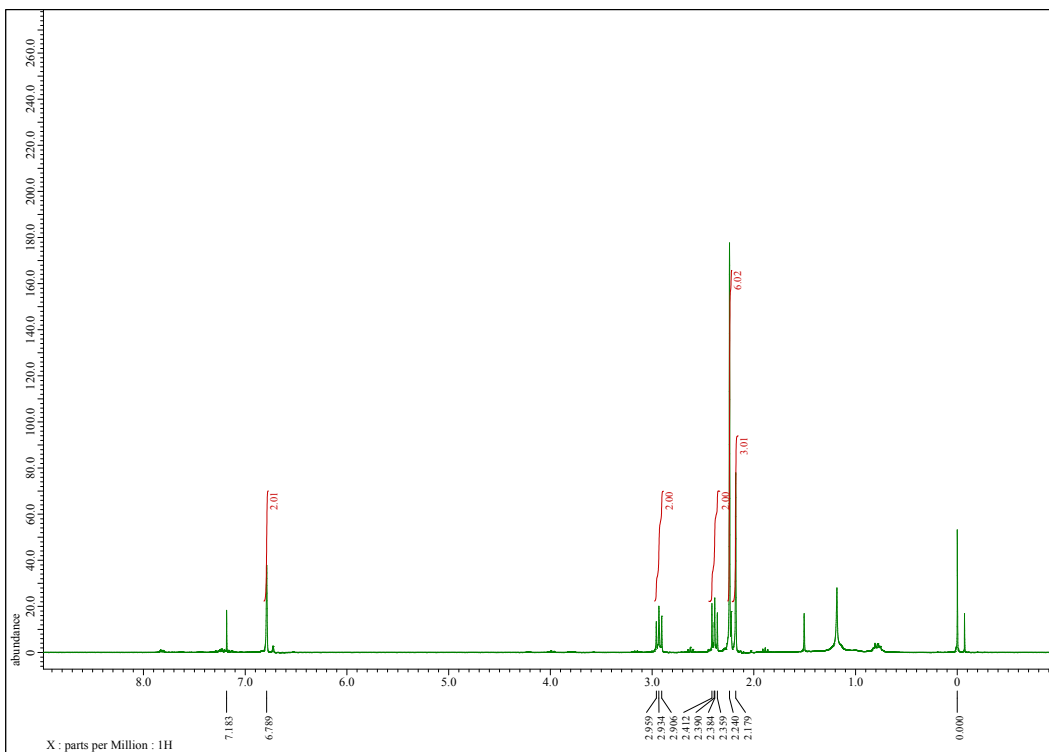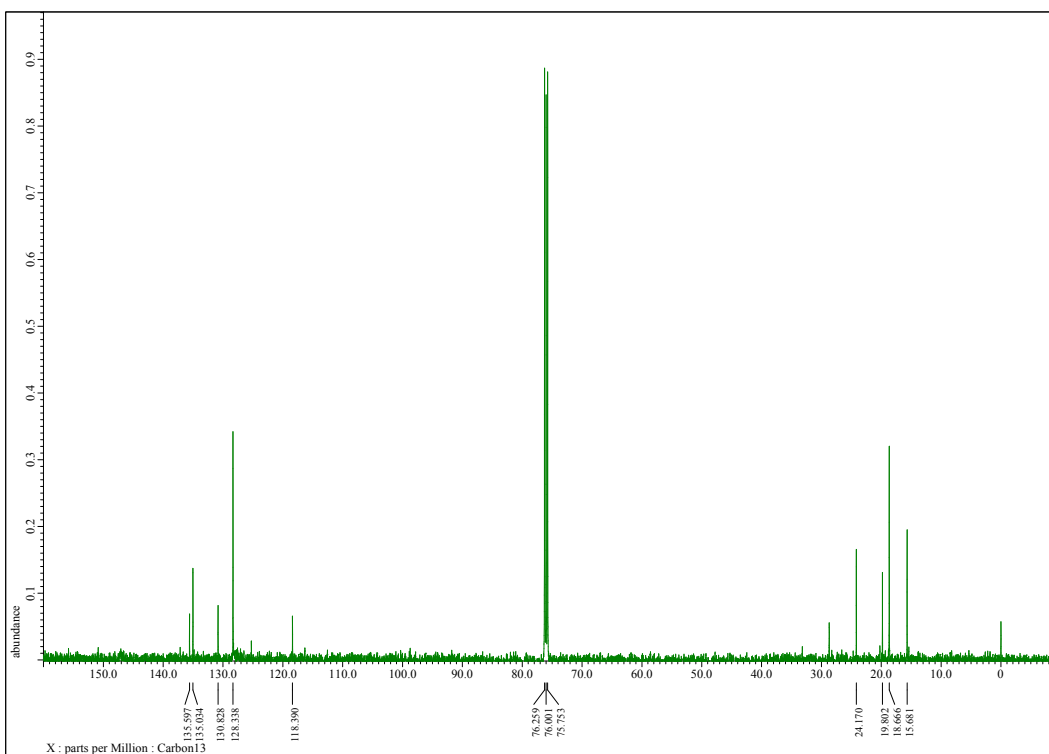

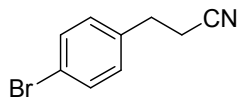

5na

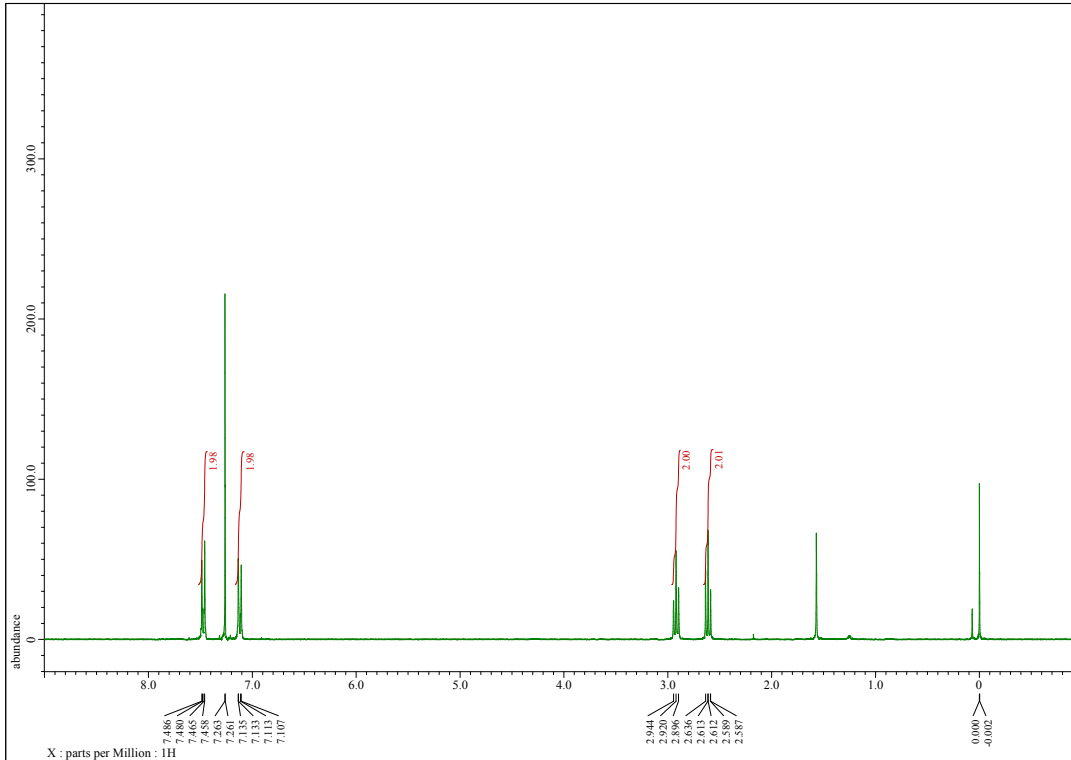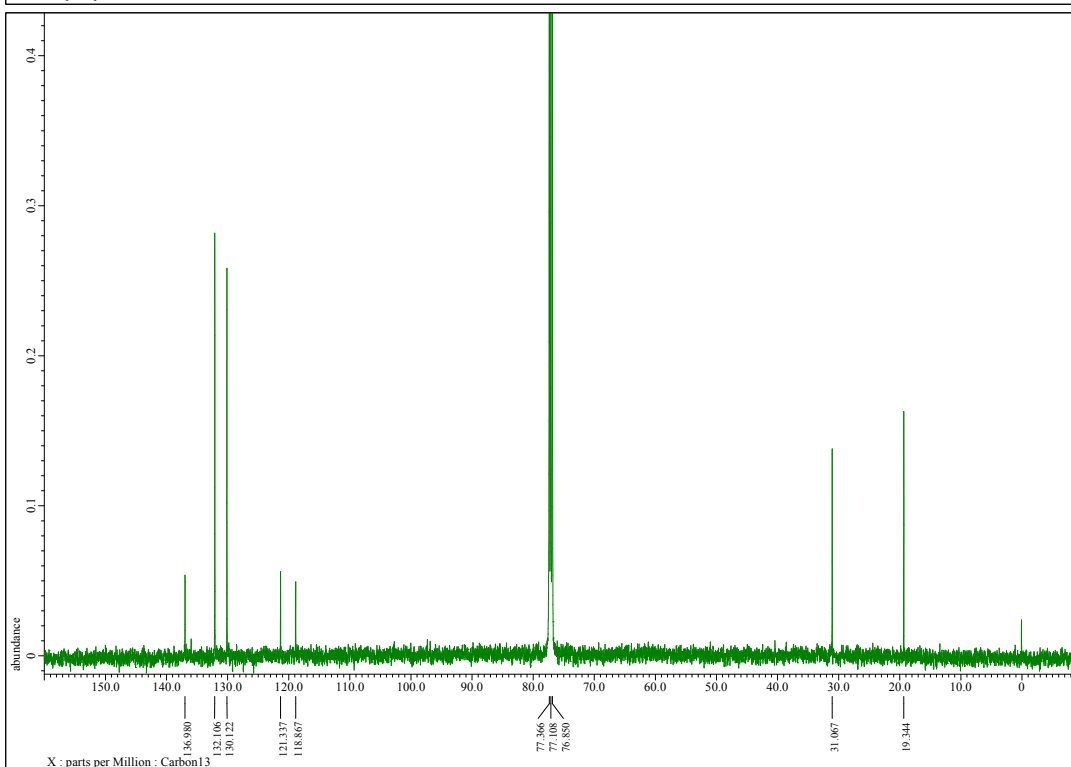

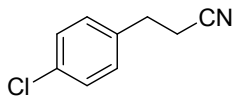

5ma

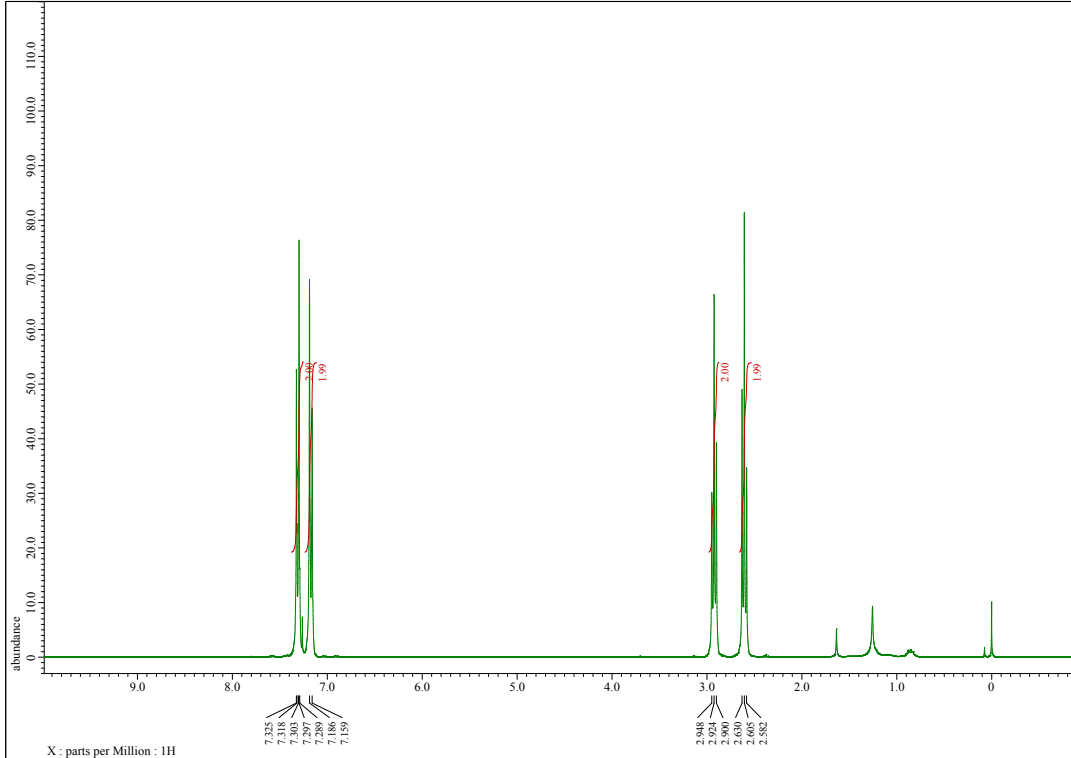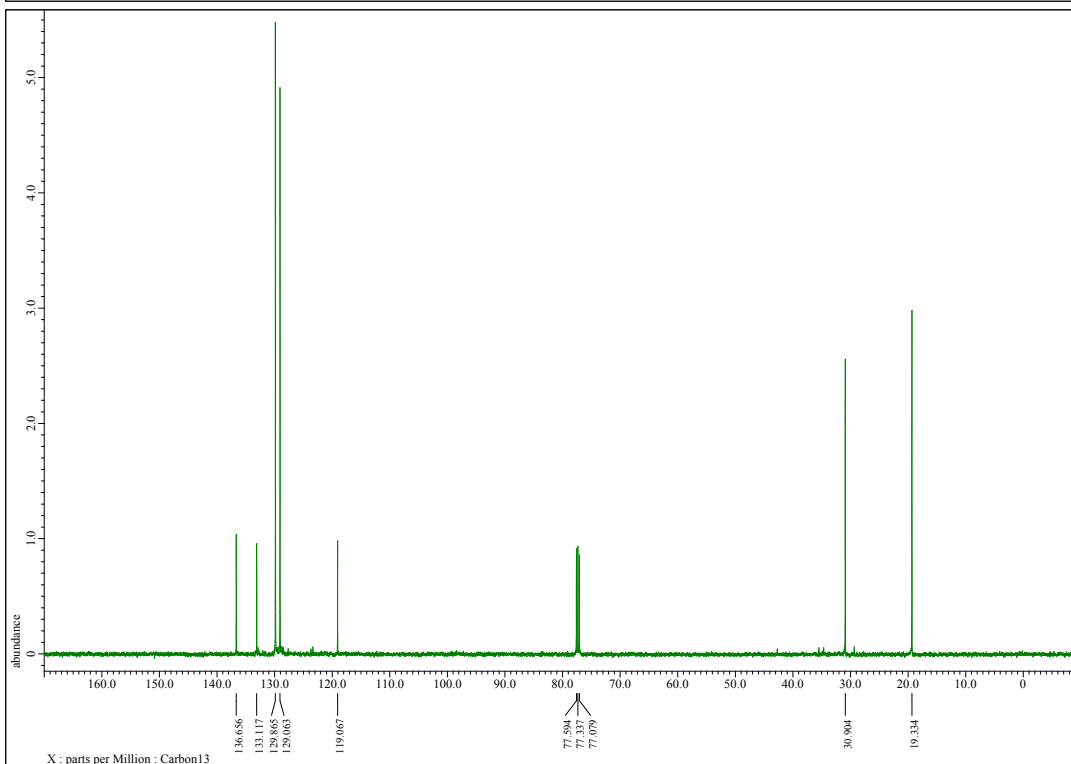

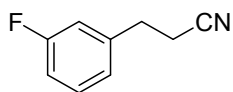

50a

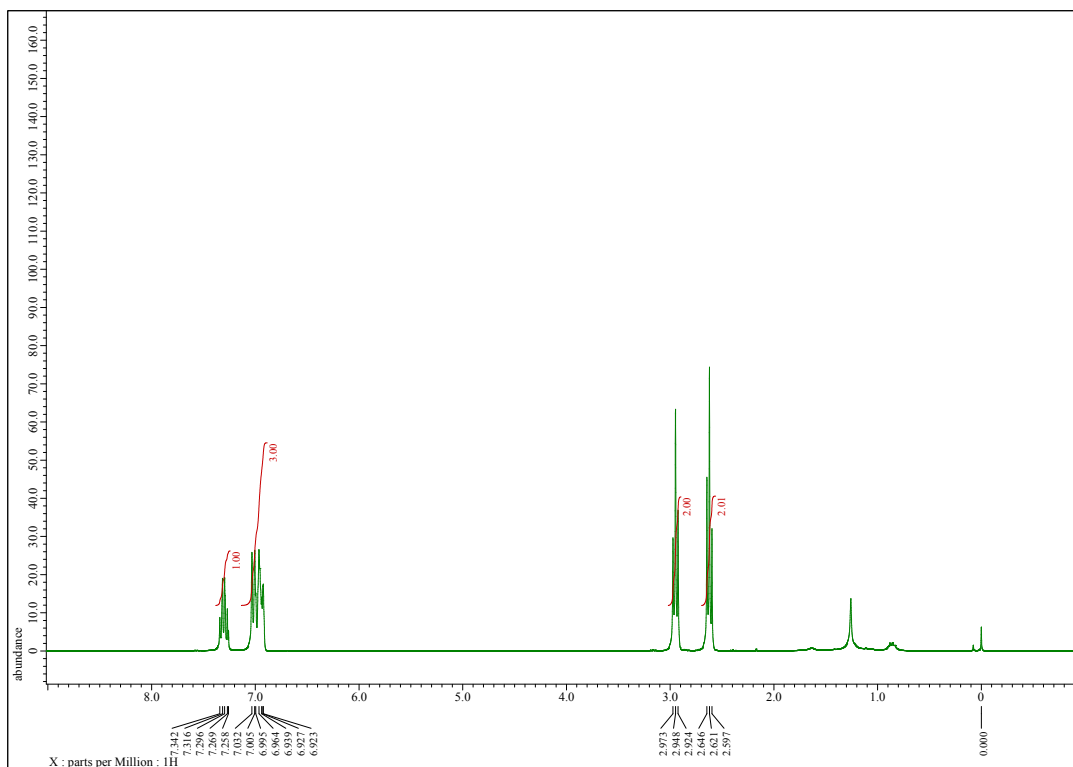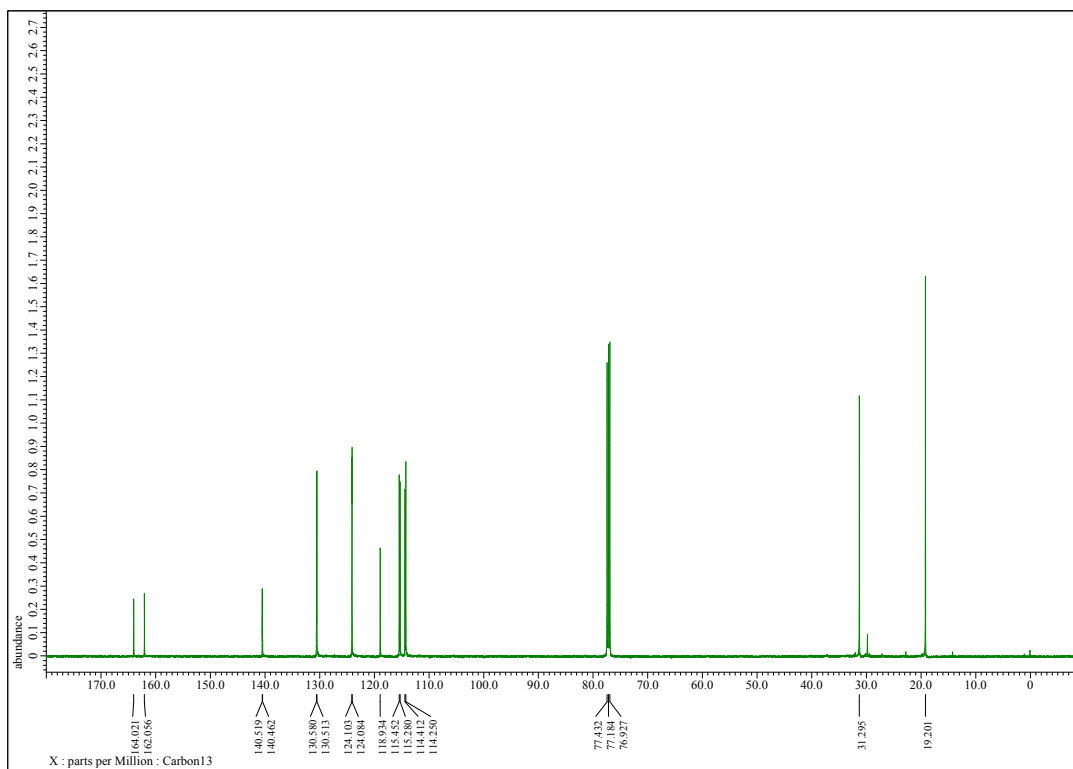

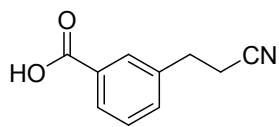

**5pa**

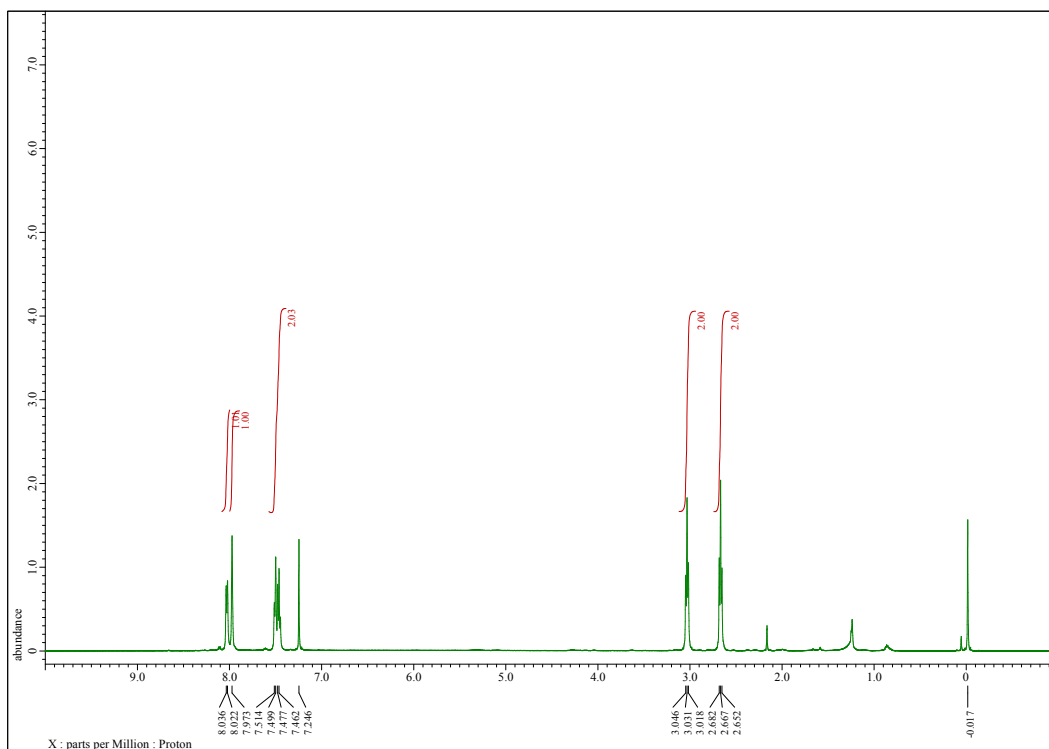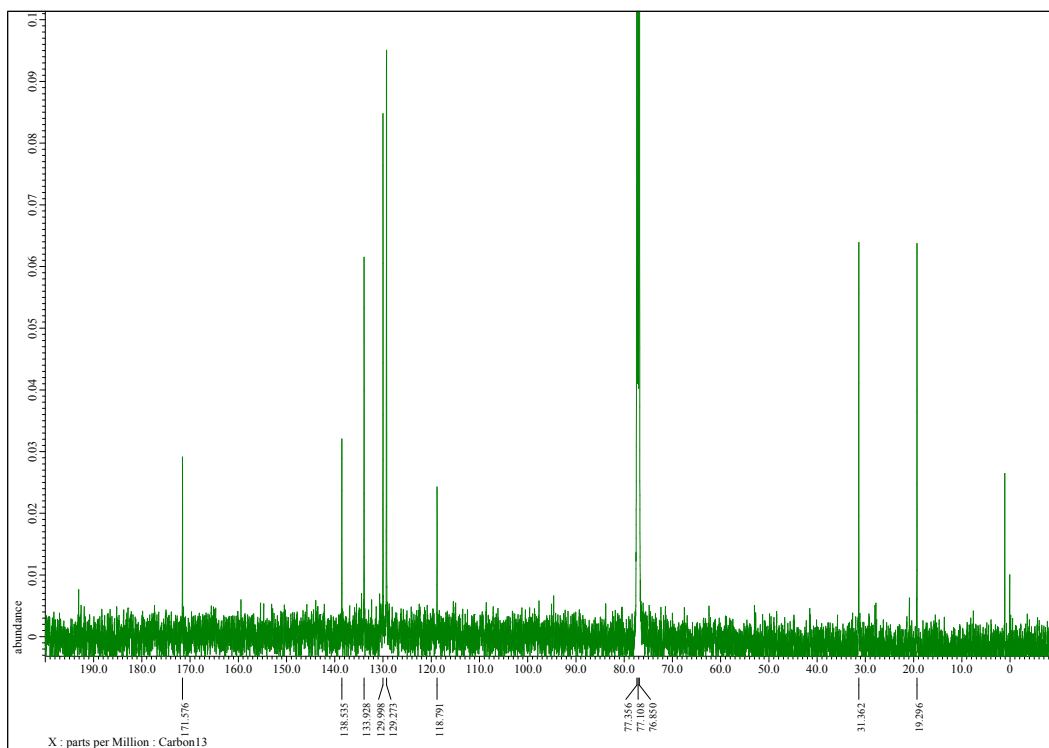



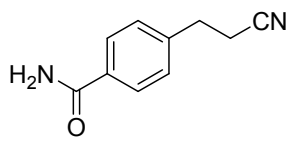

5qa

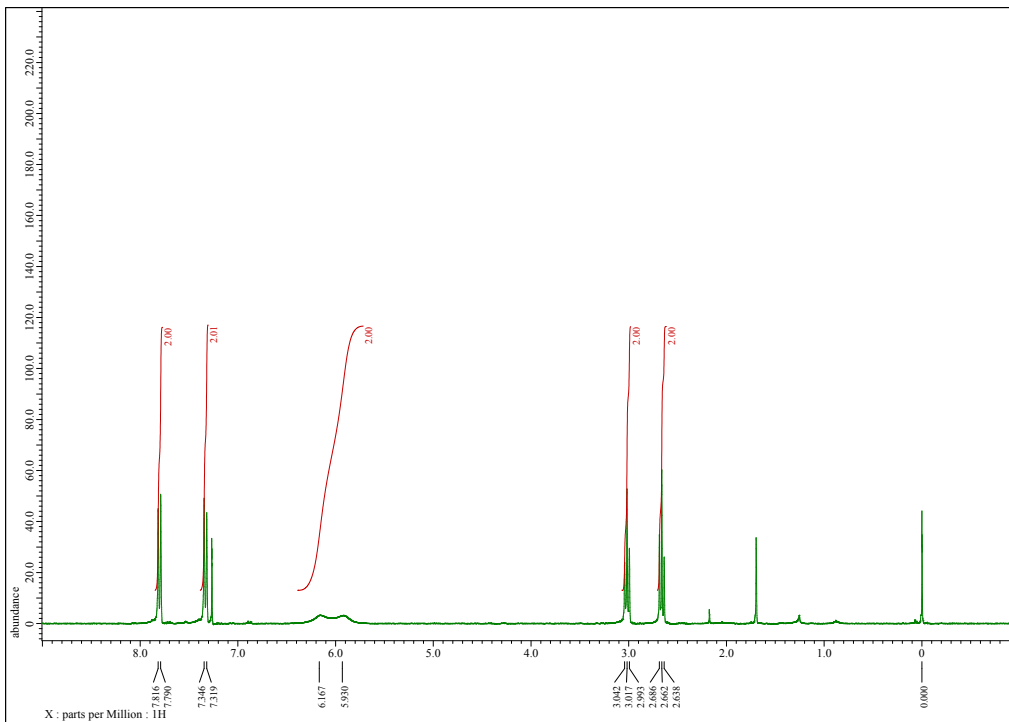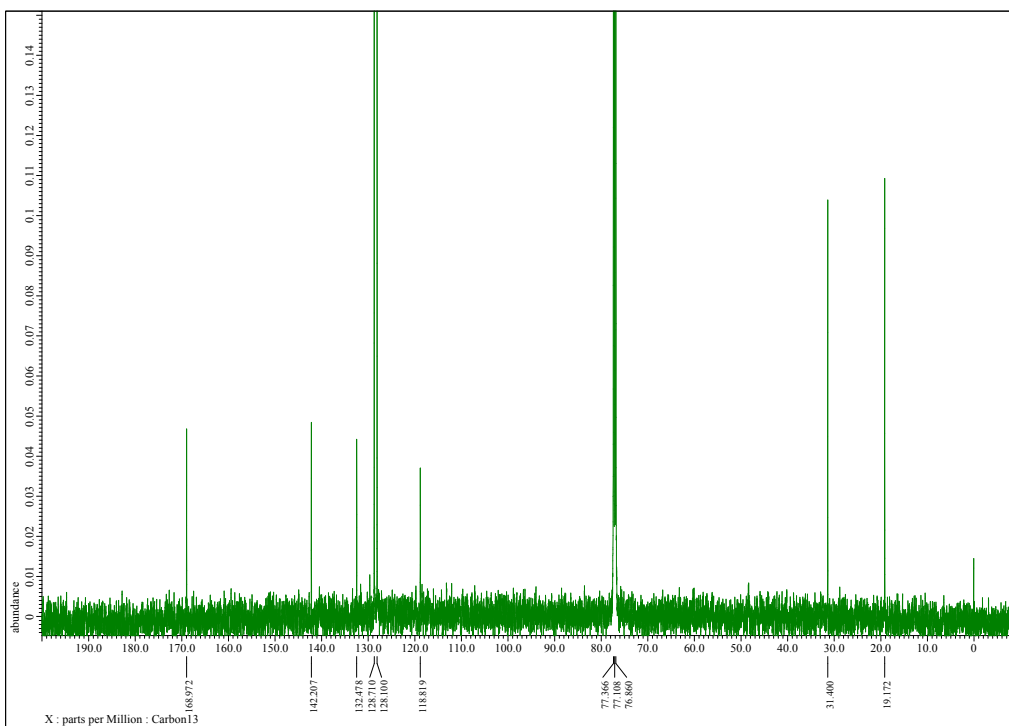

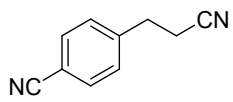

5ra

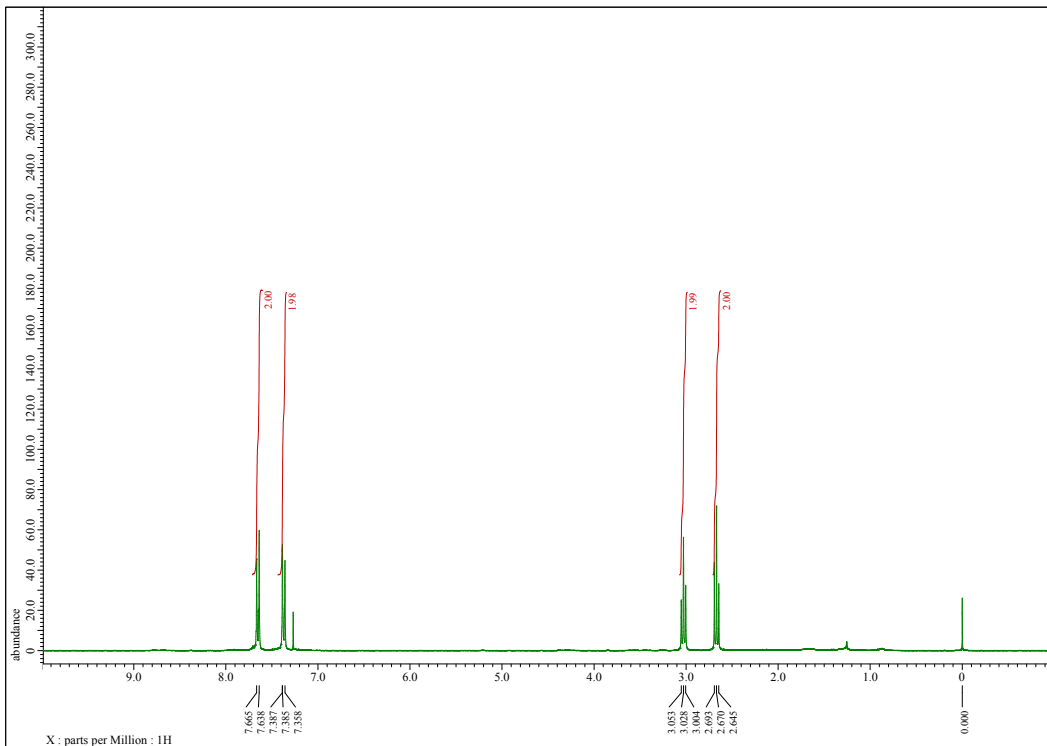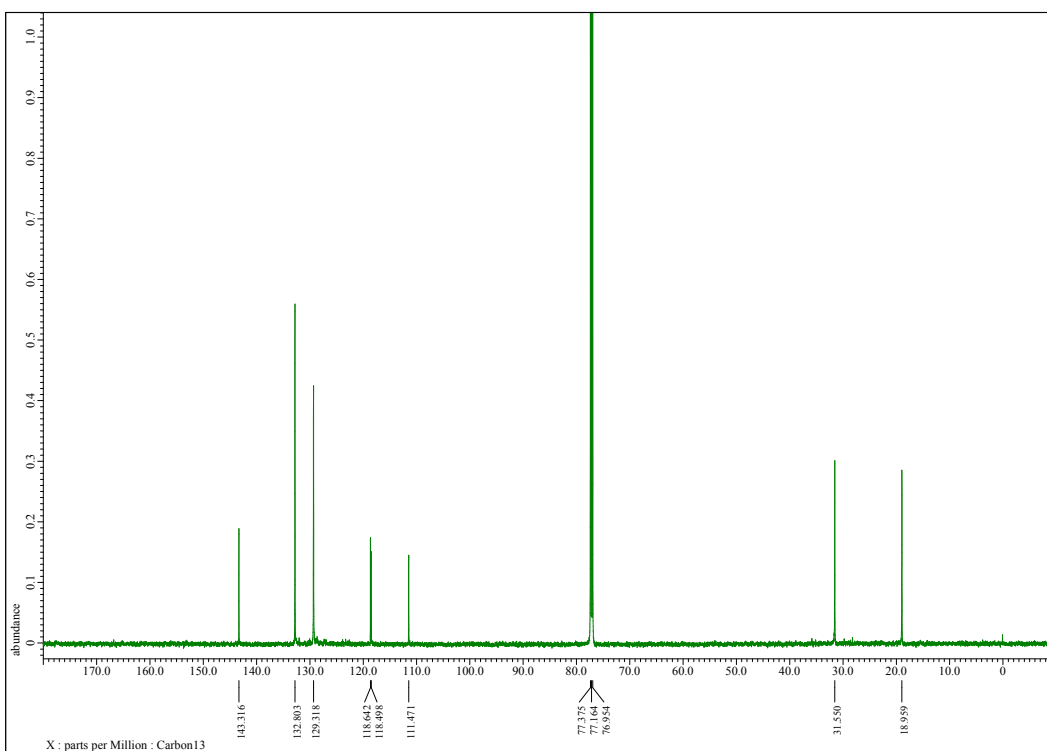

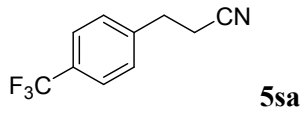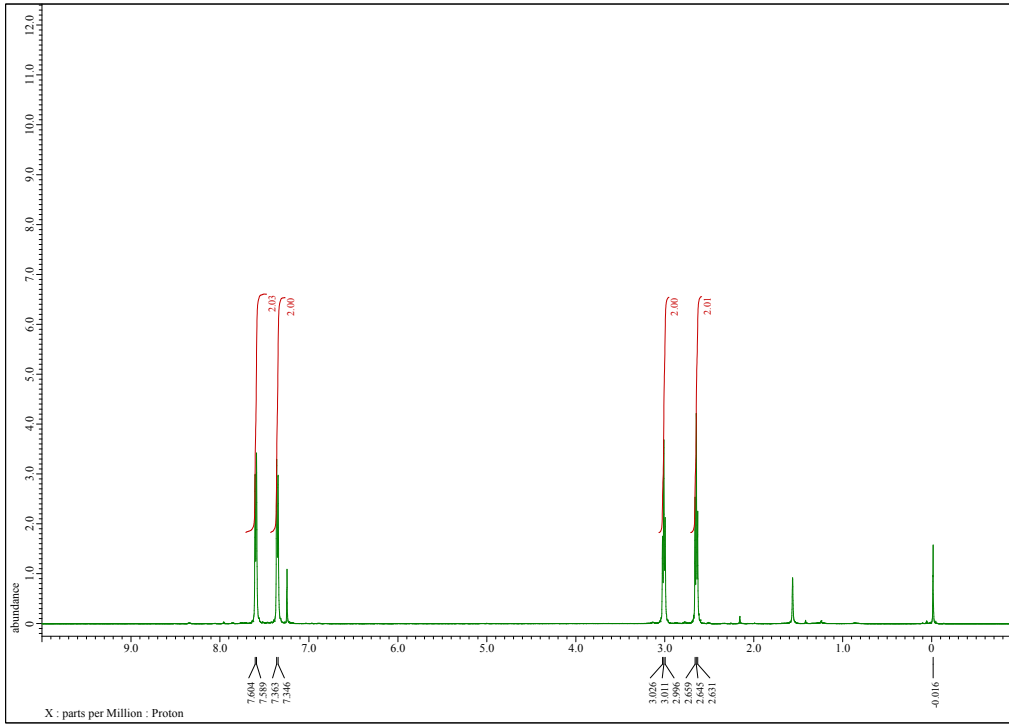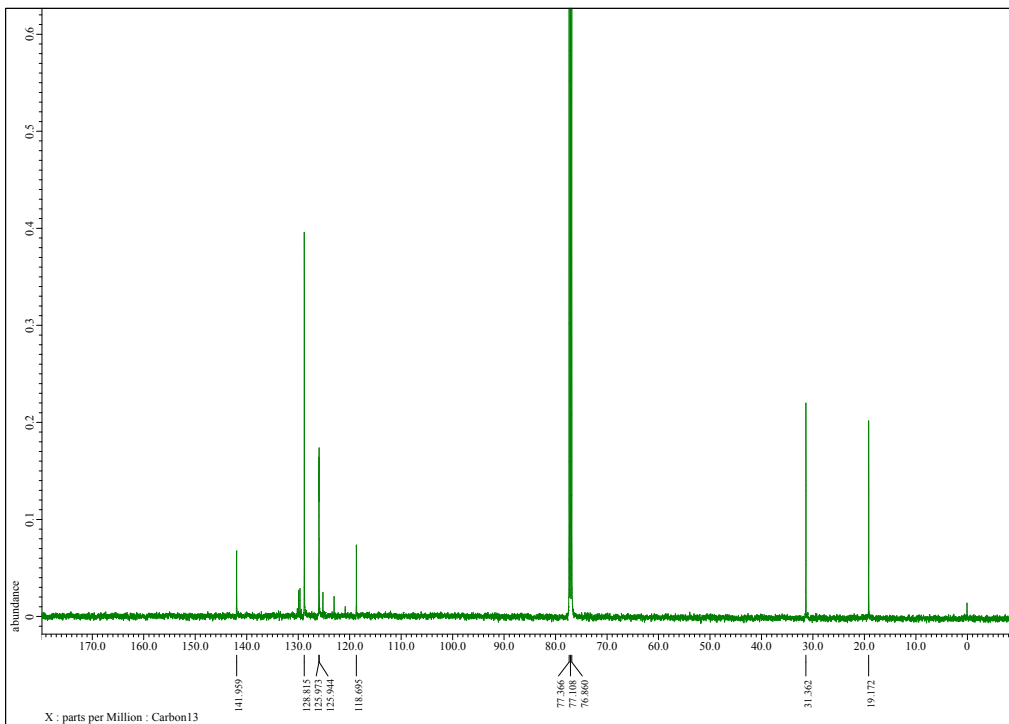

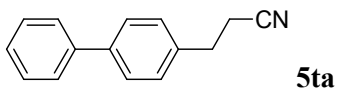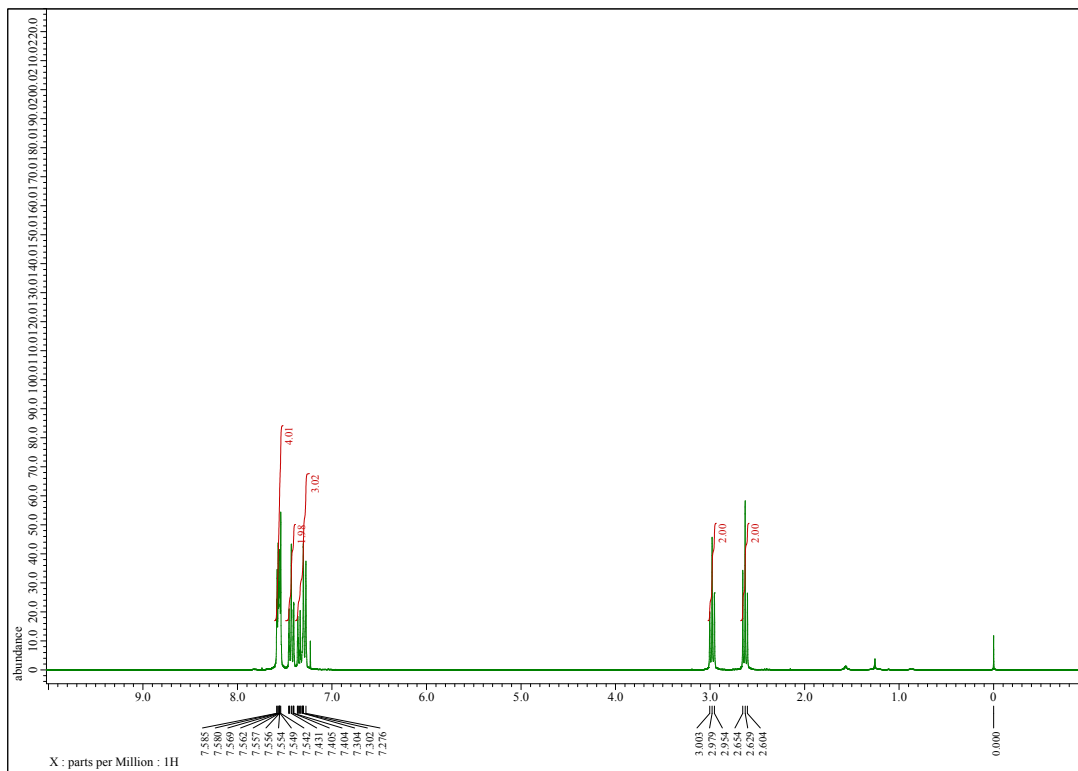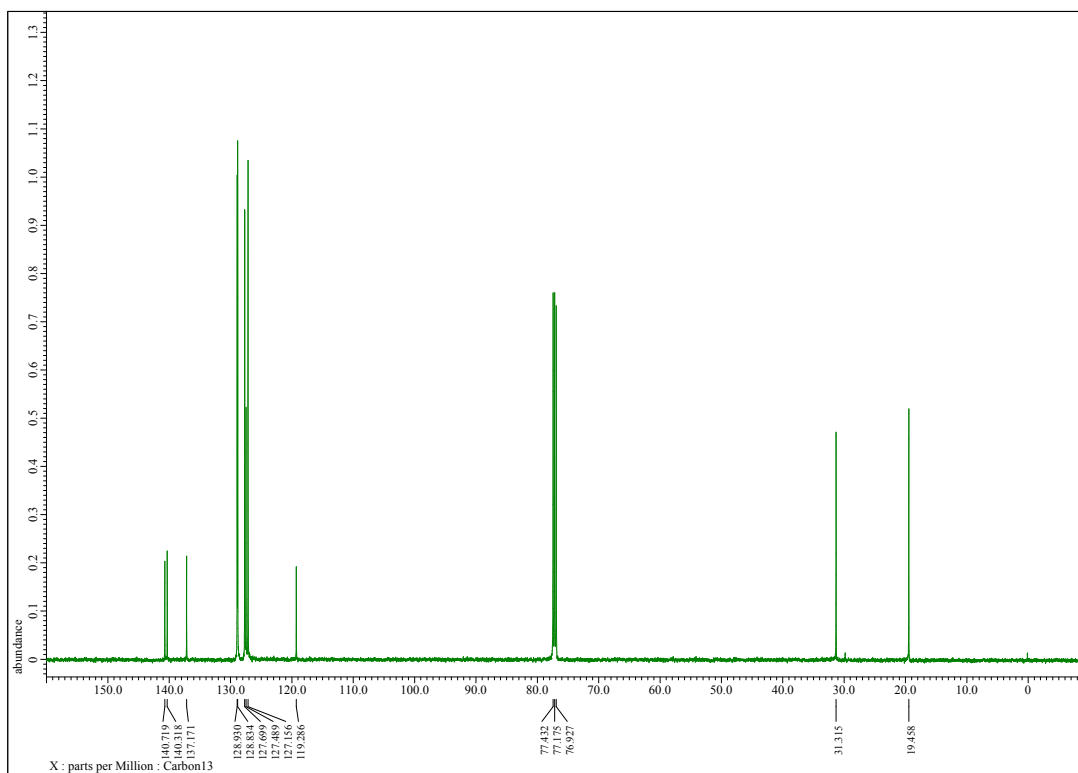

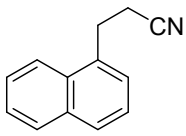

**5ua**

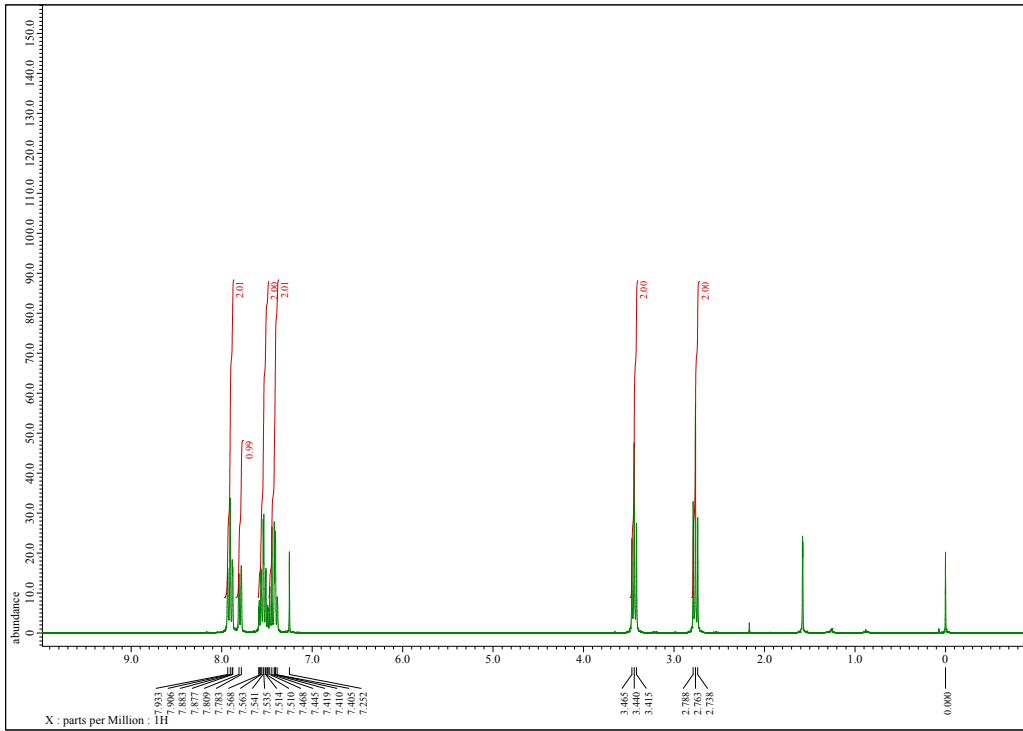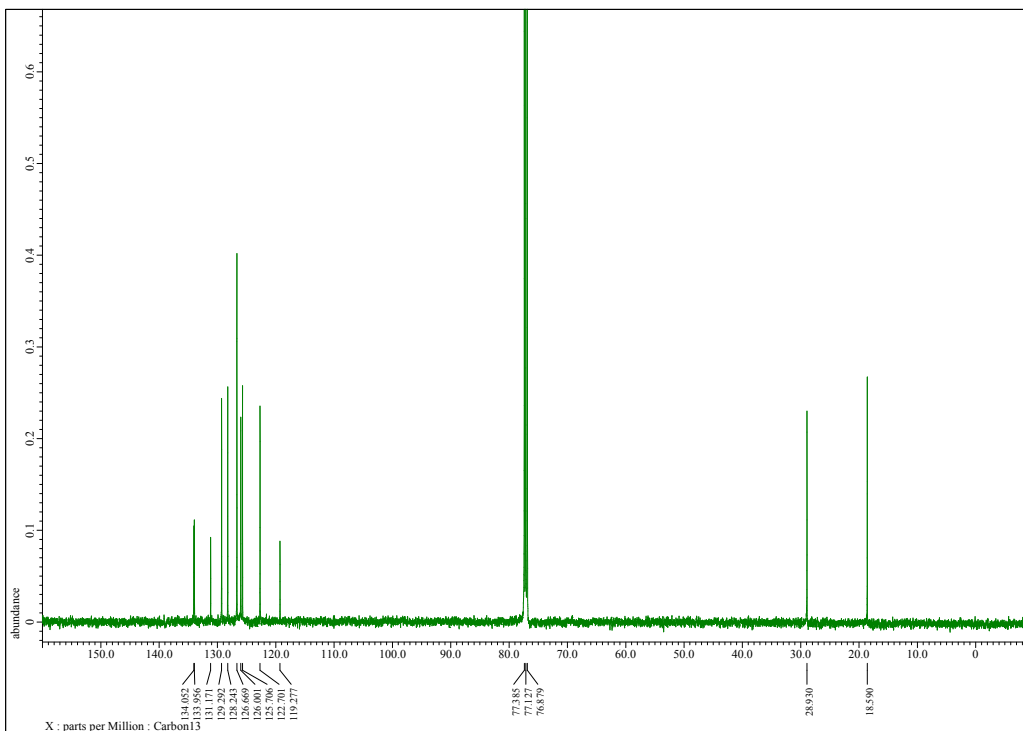

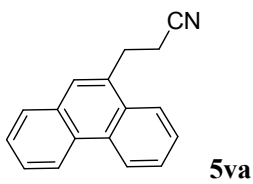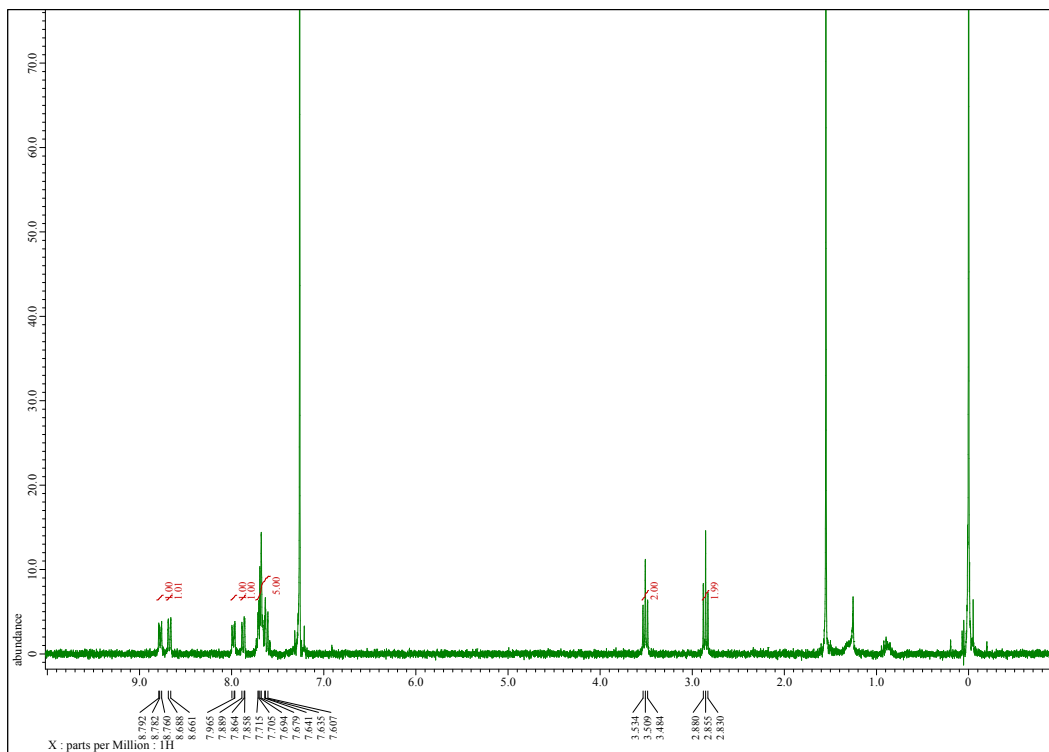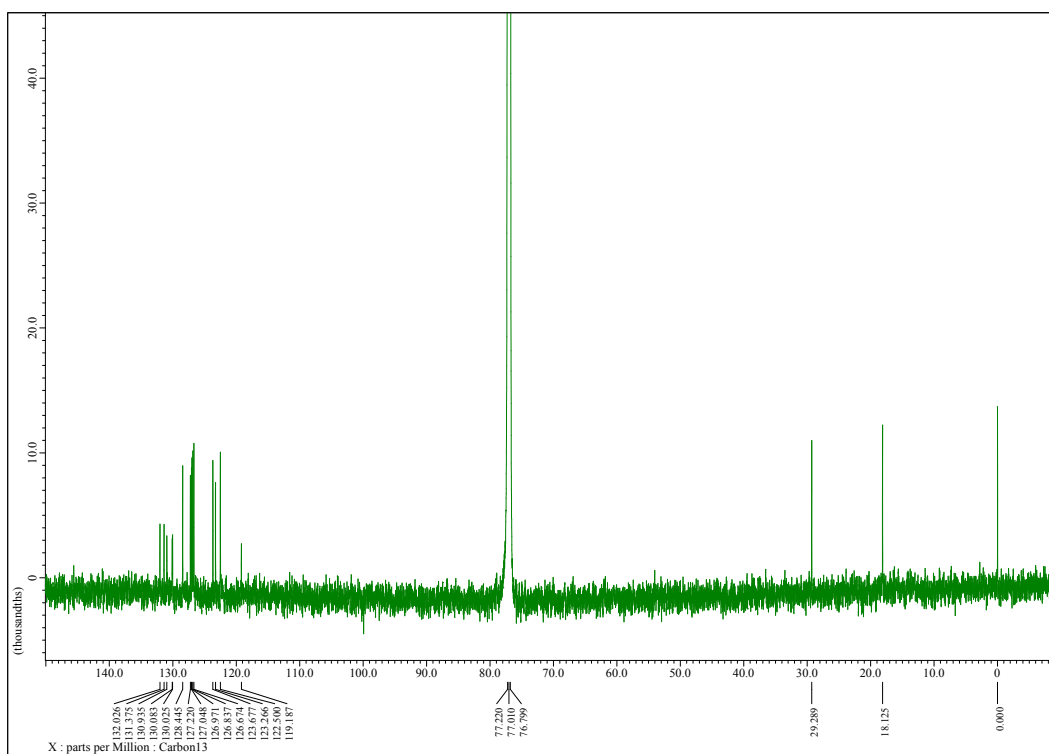

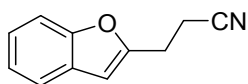

5wa

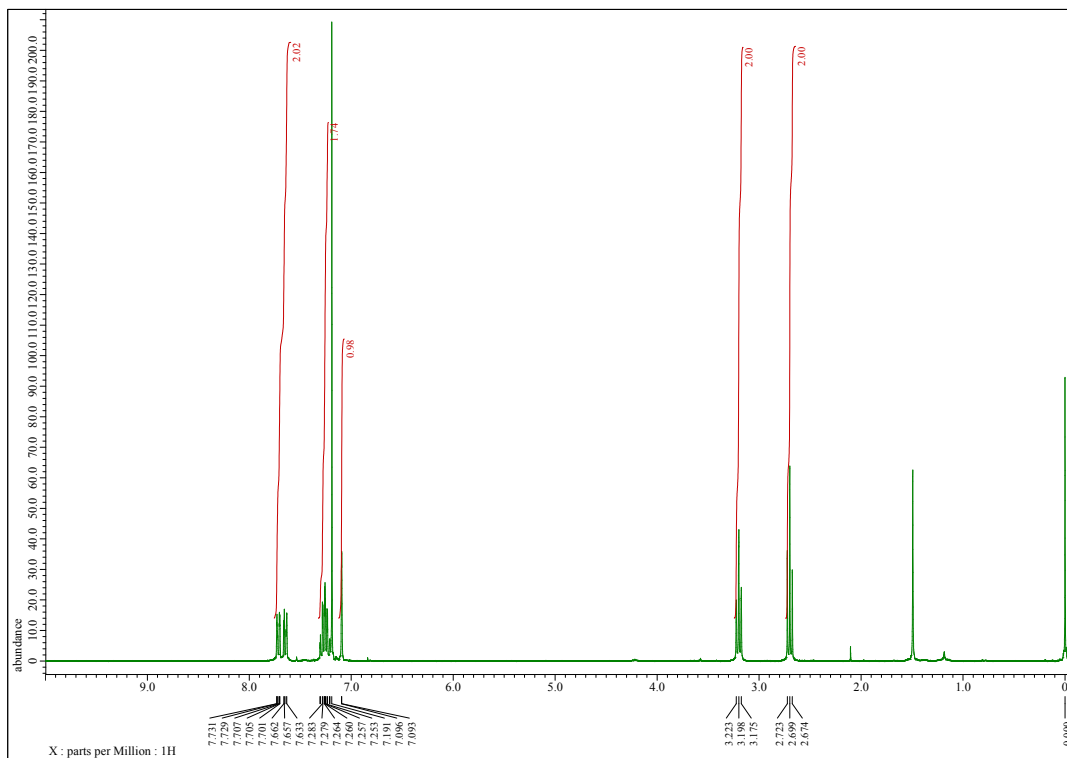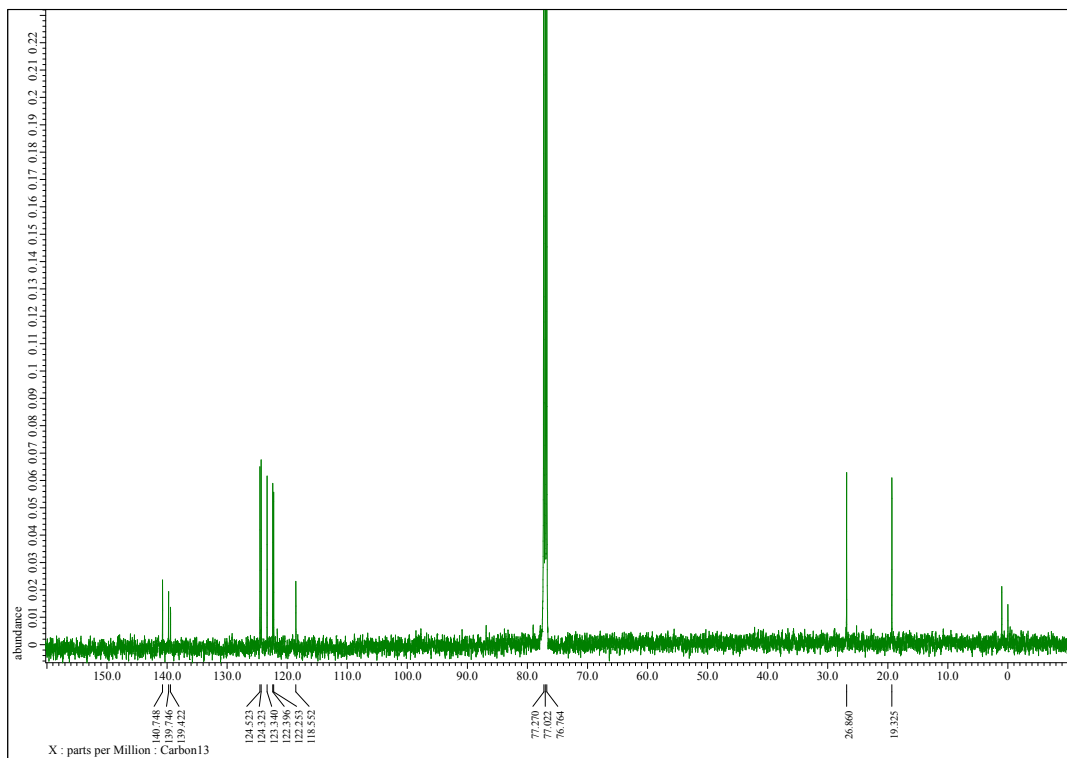

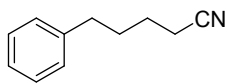

7aa

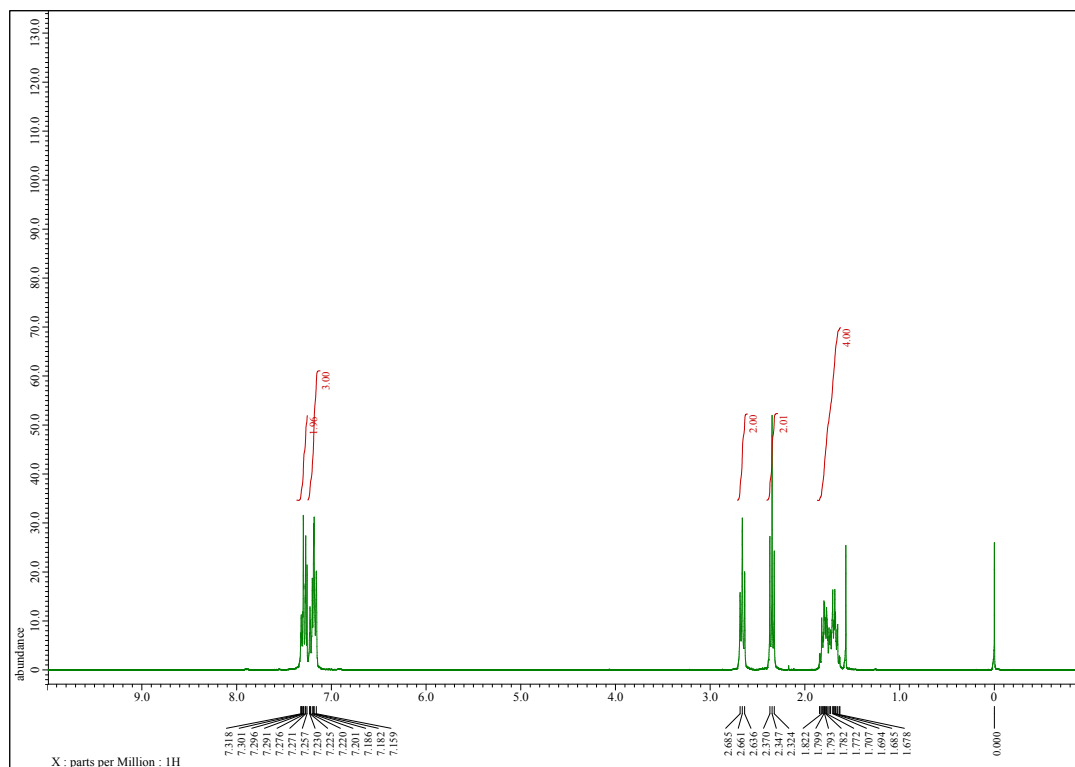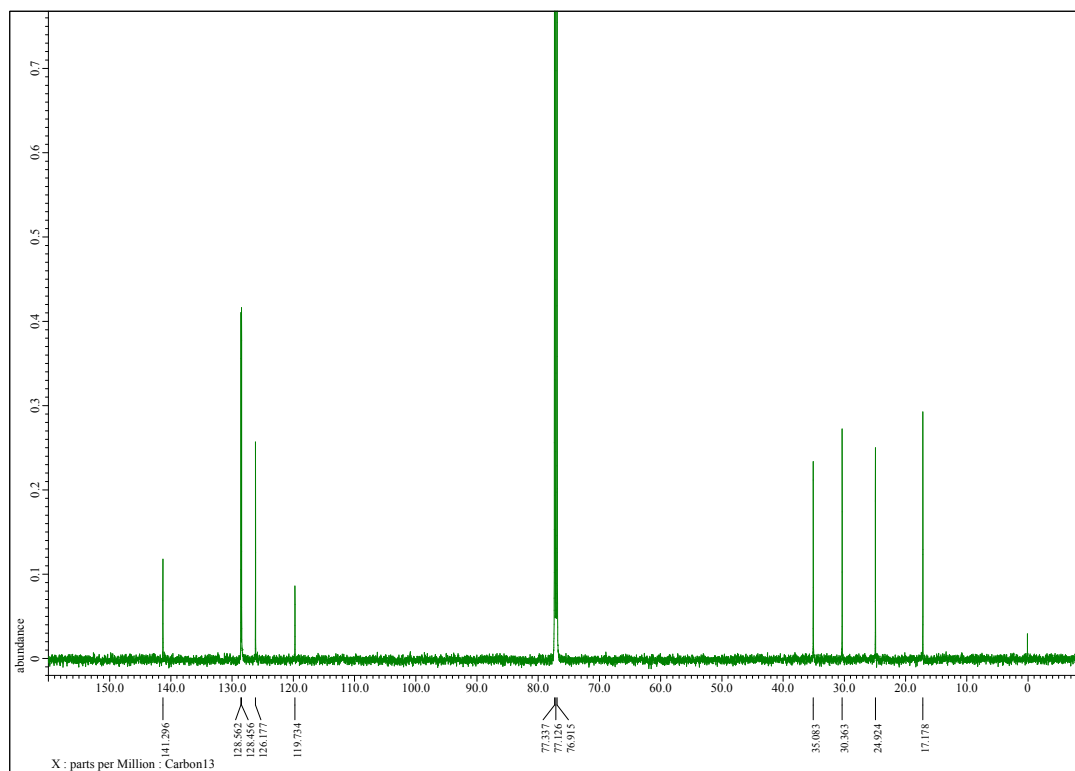



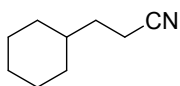

**7ba**

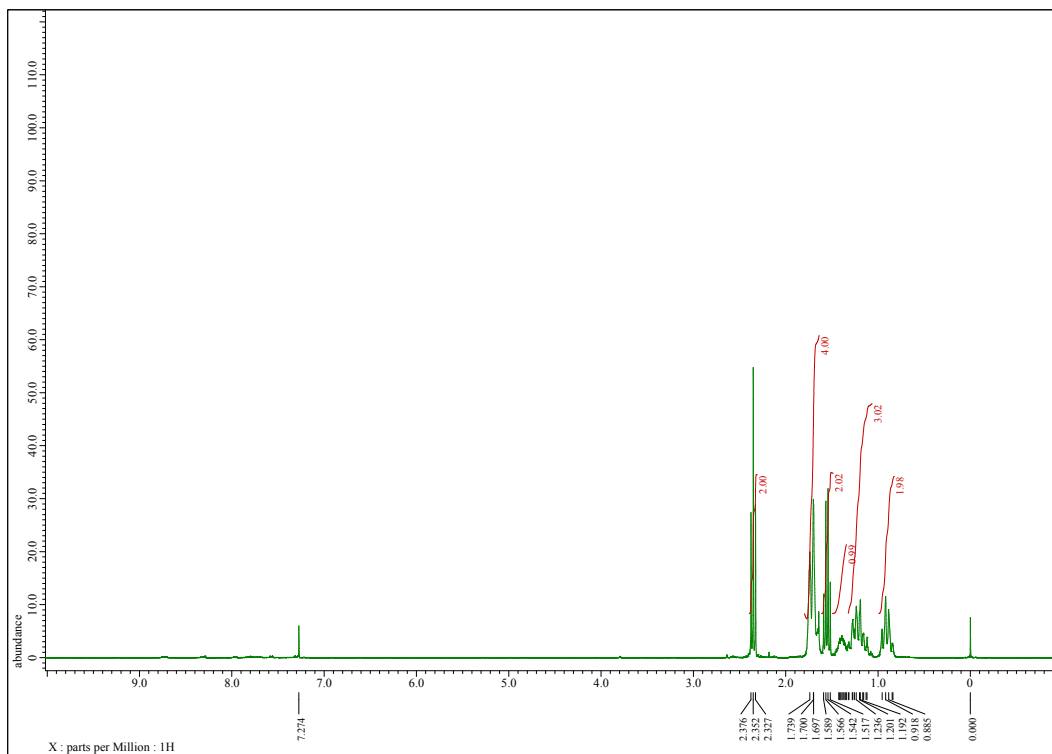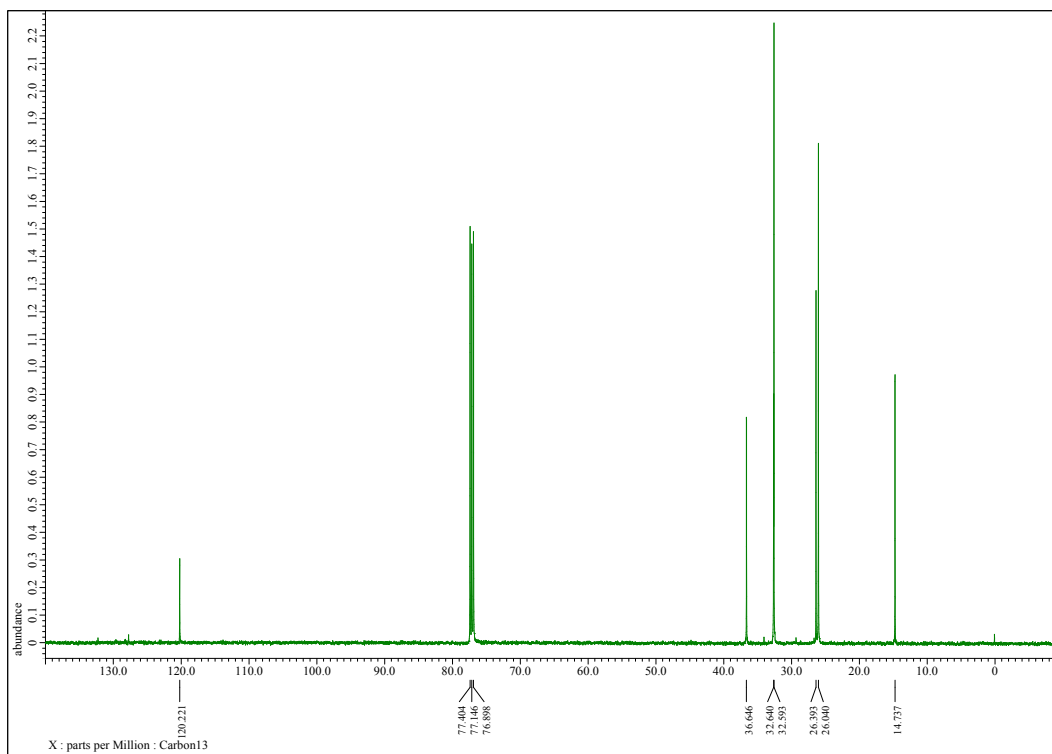

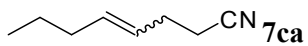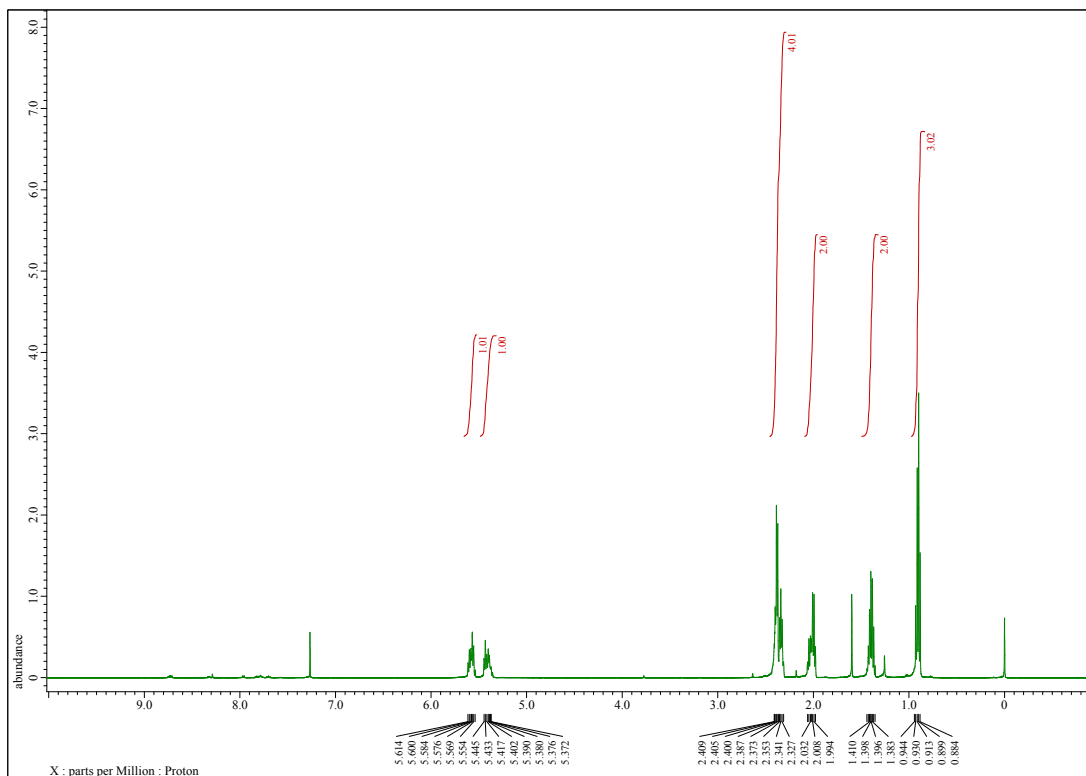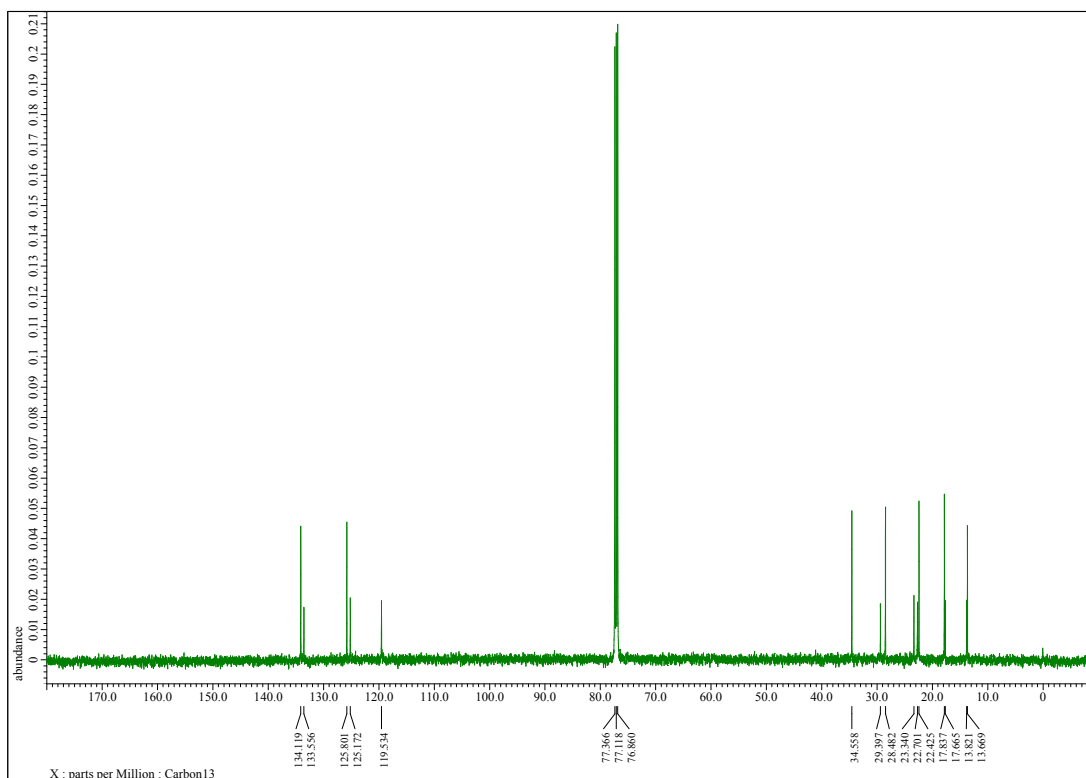

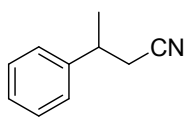

**5ab**

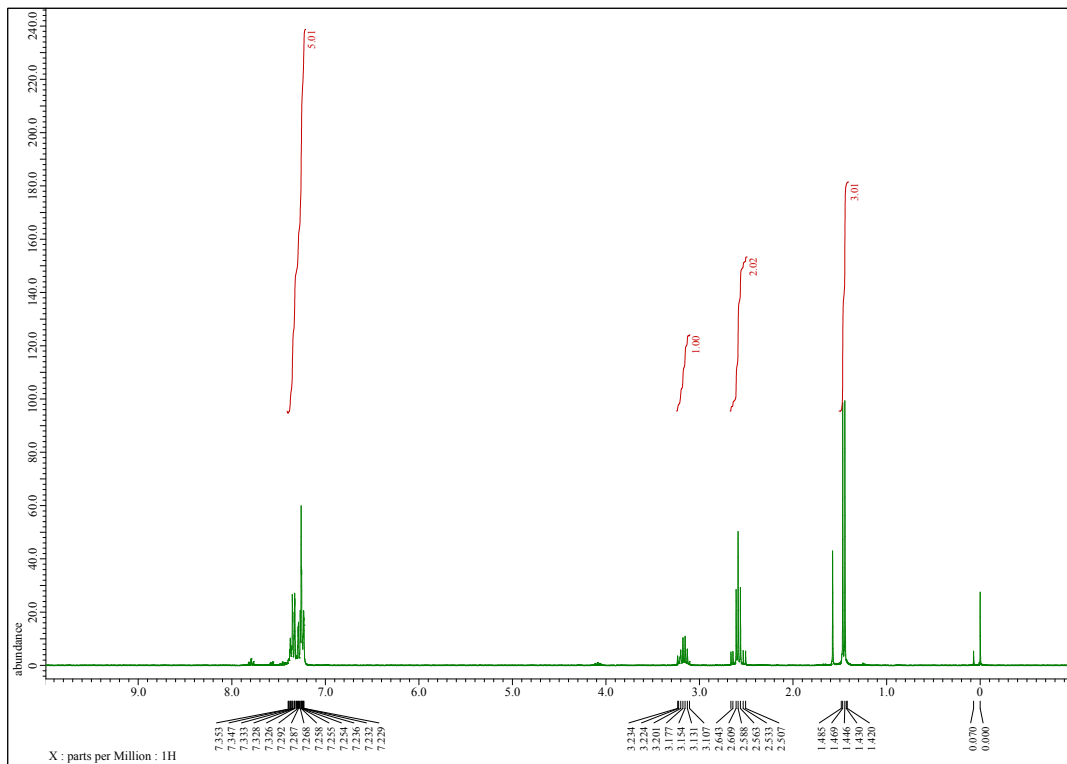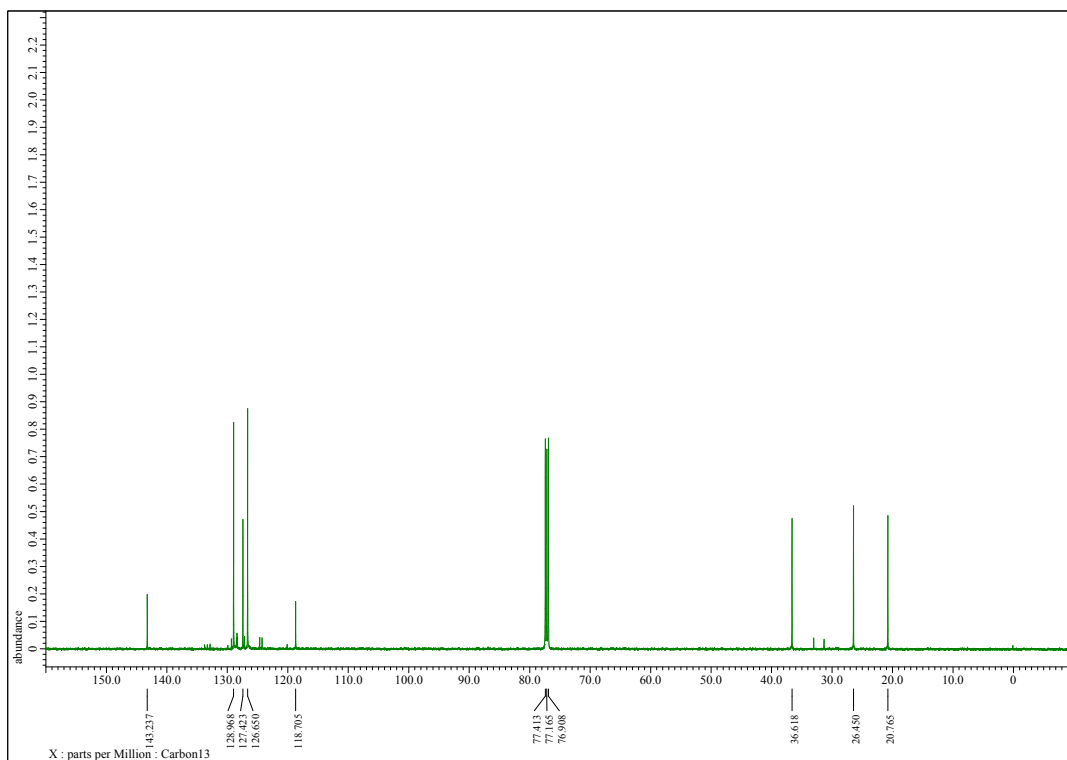

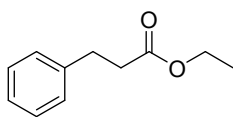

5ac

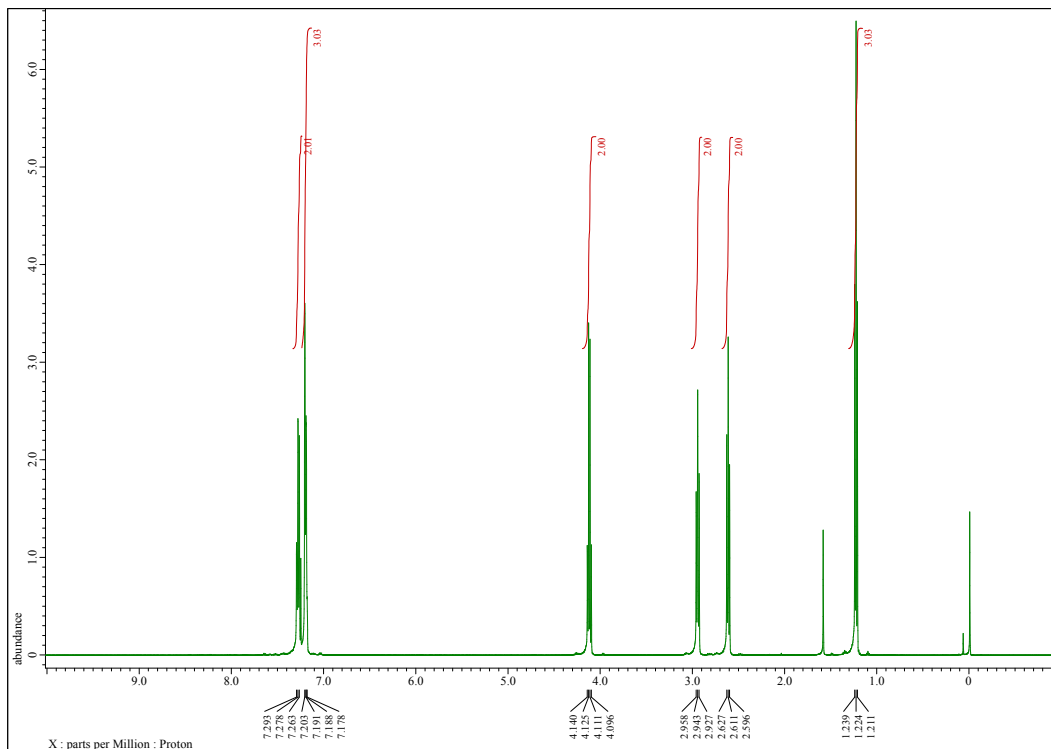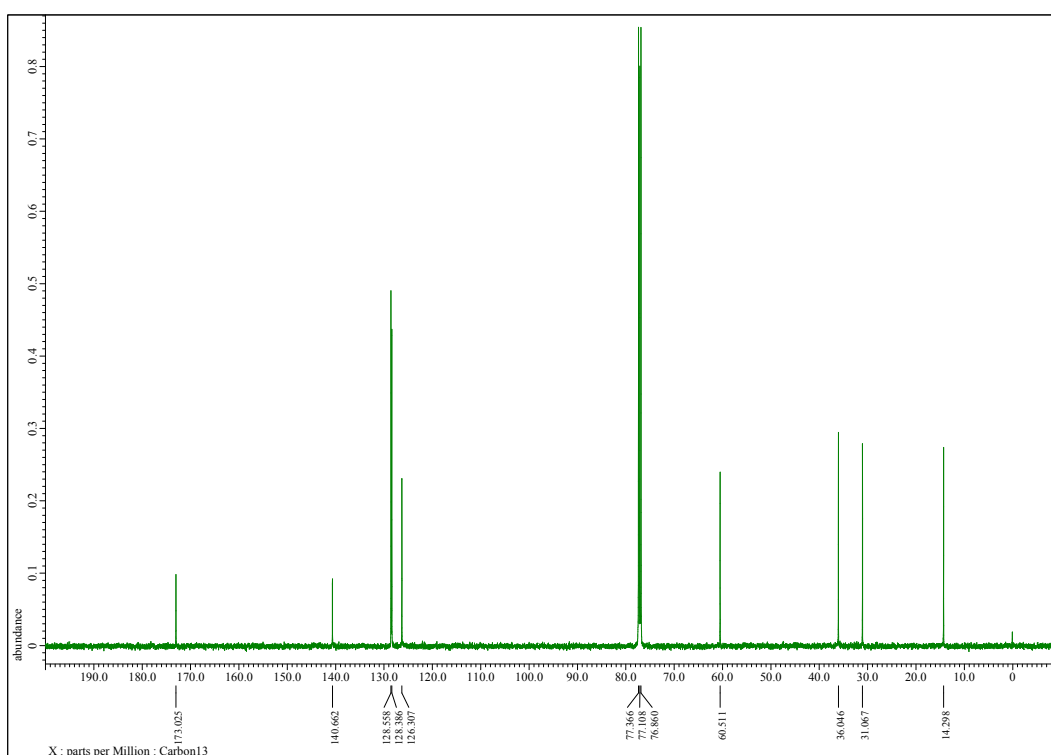

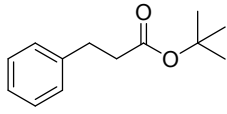

5ad

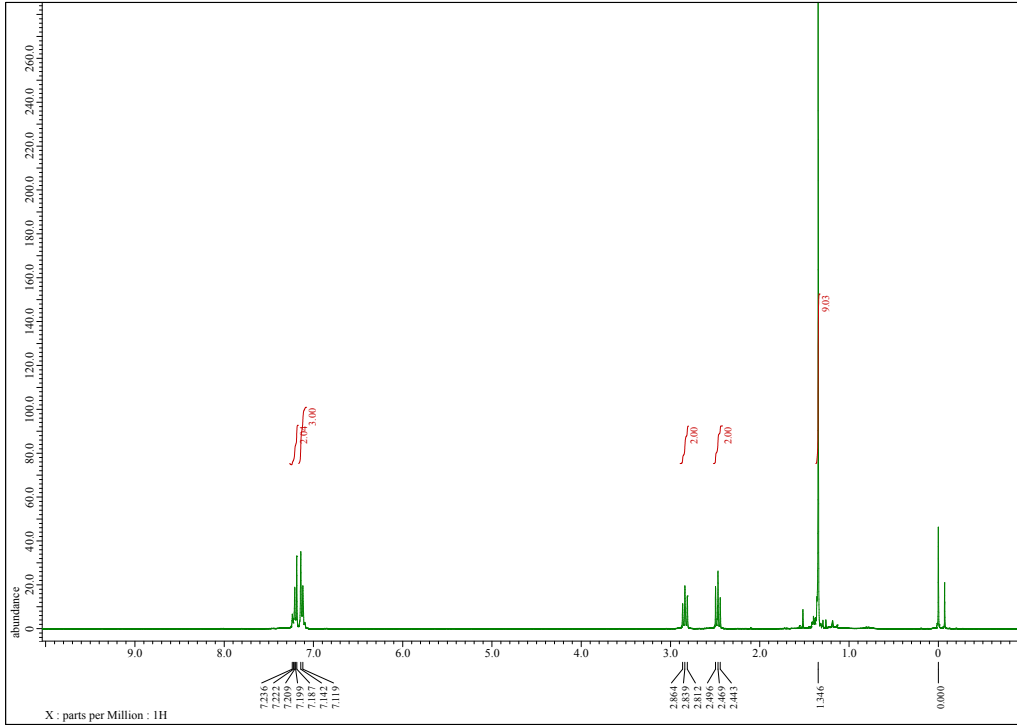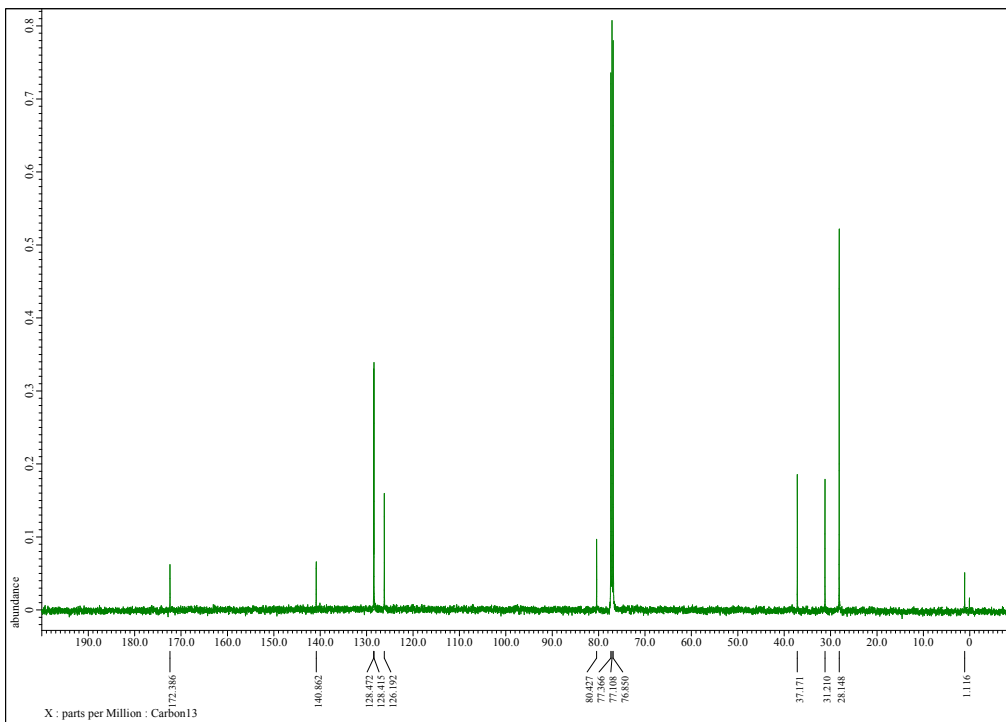

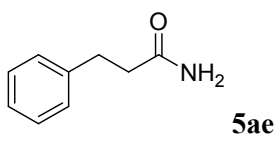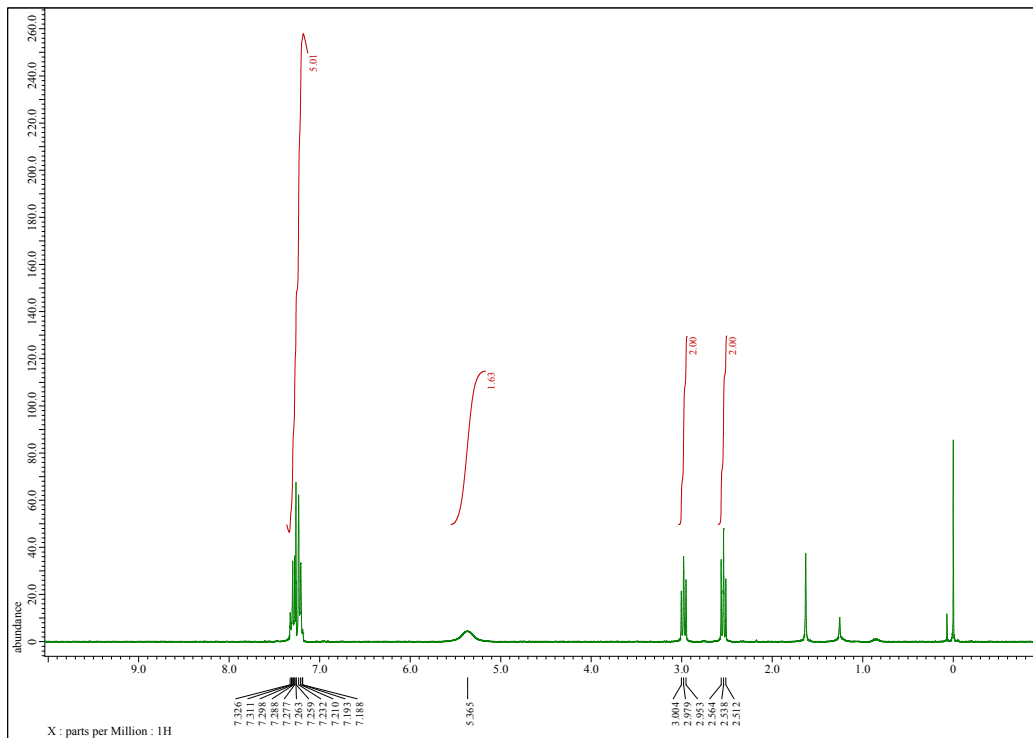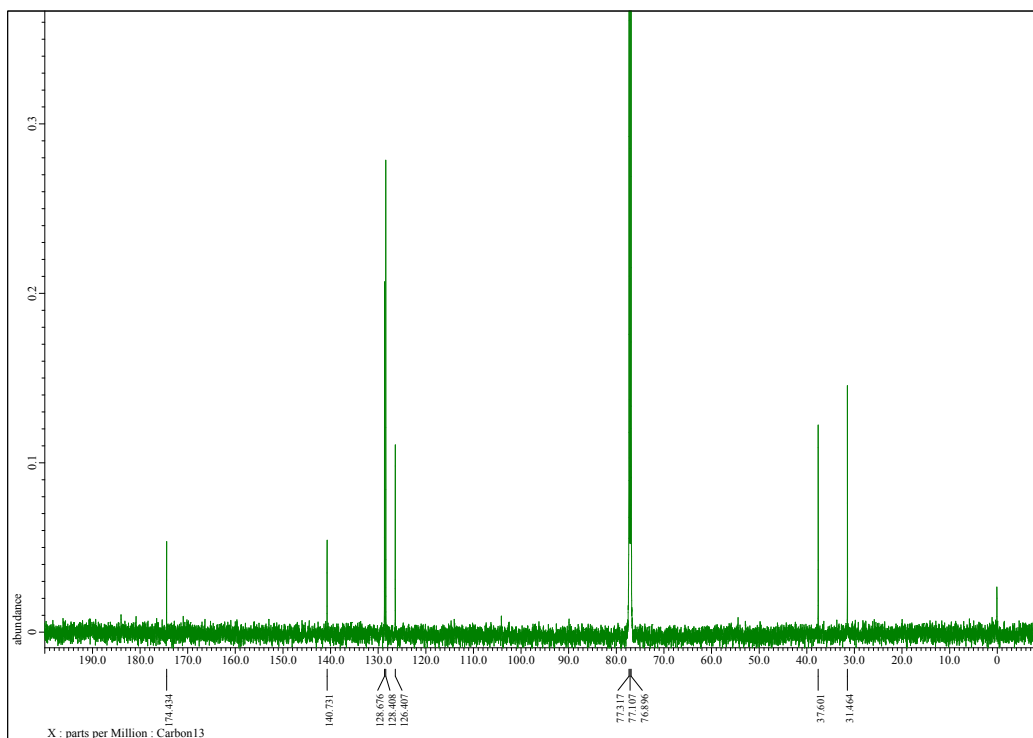

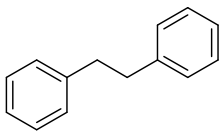

5af

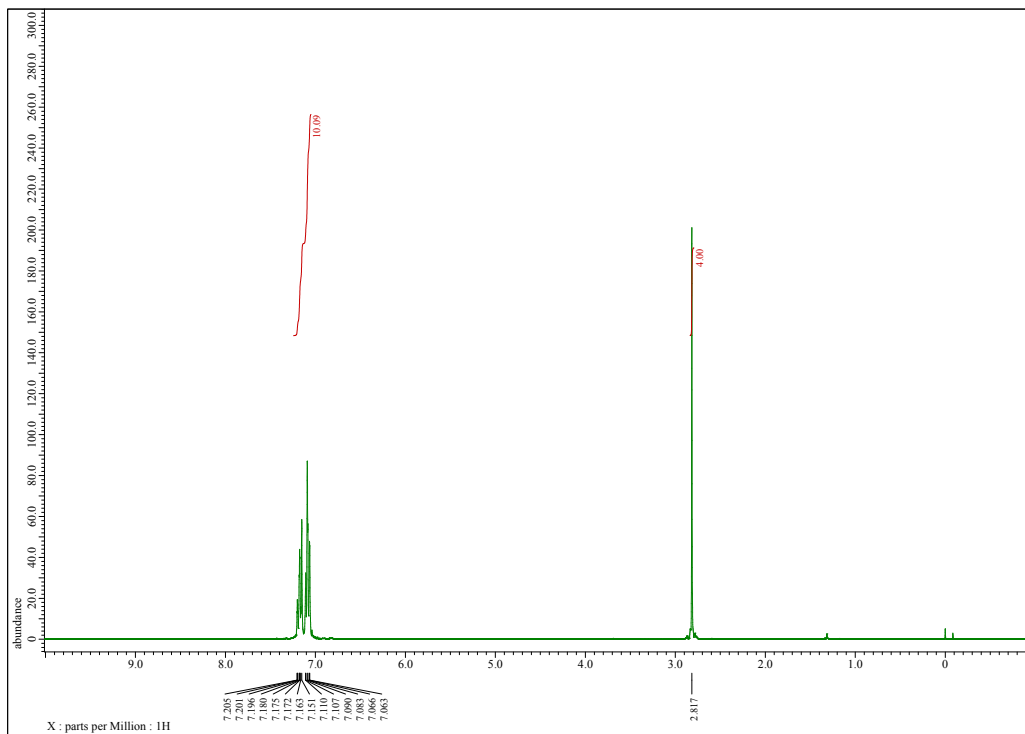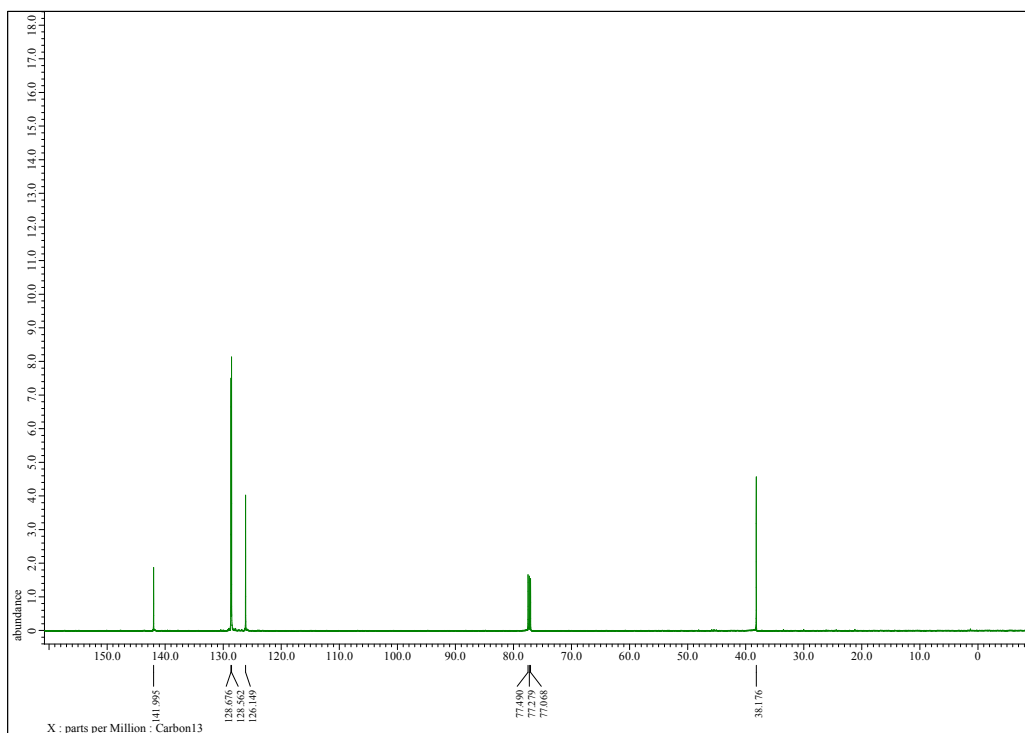

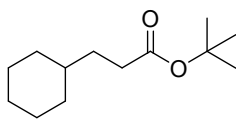

7bd

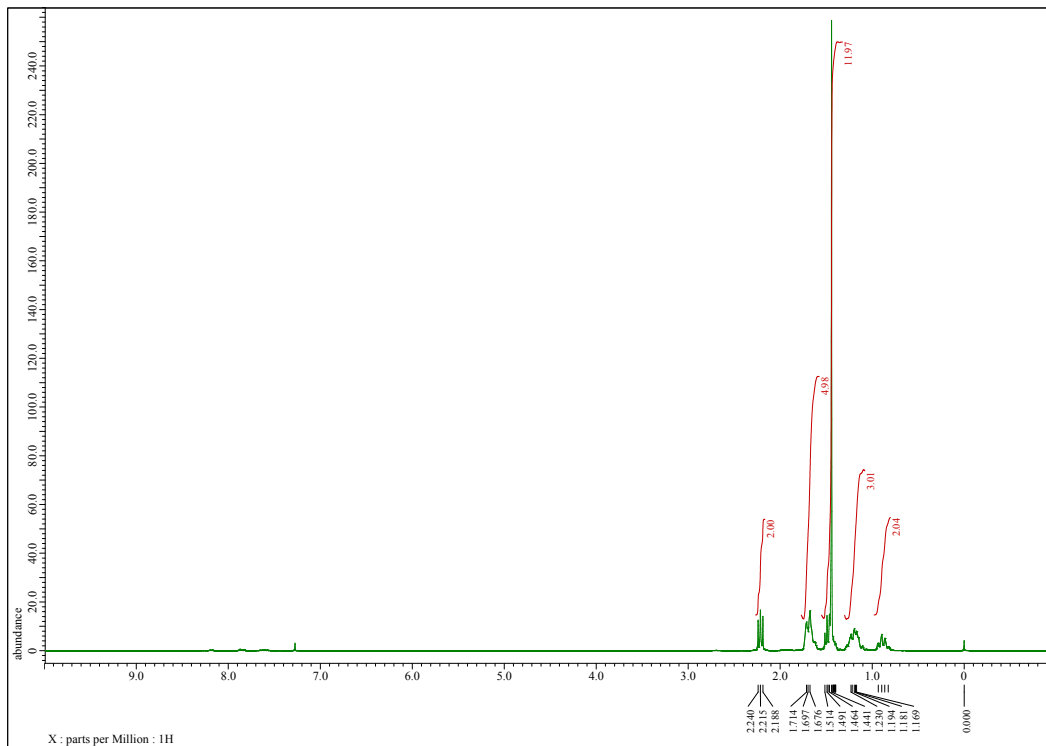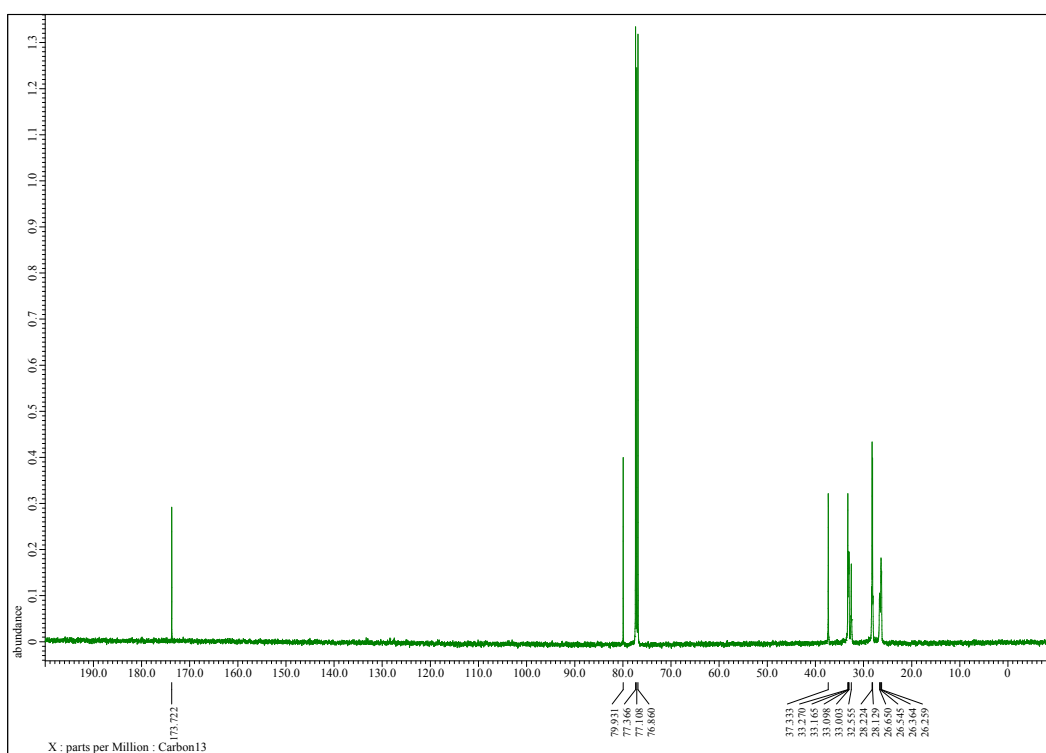



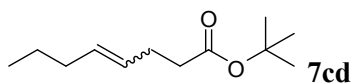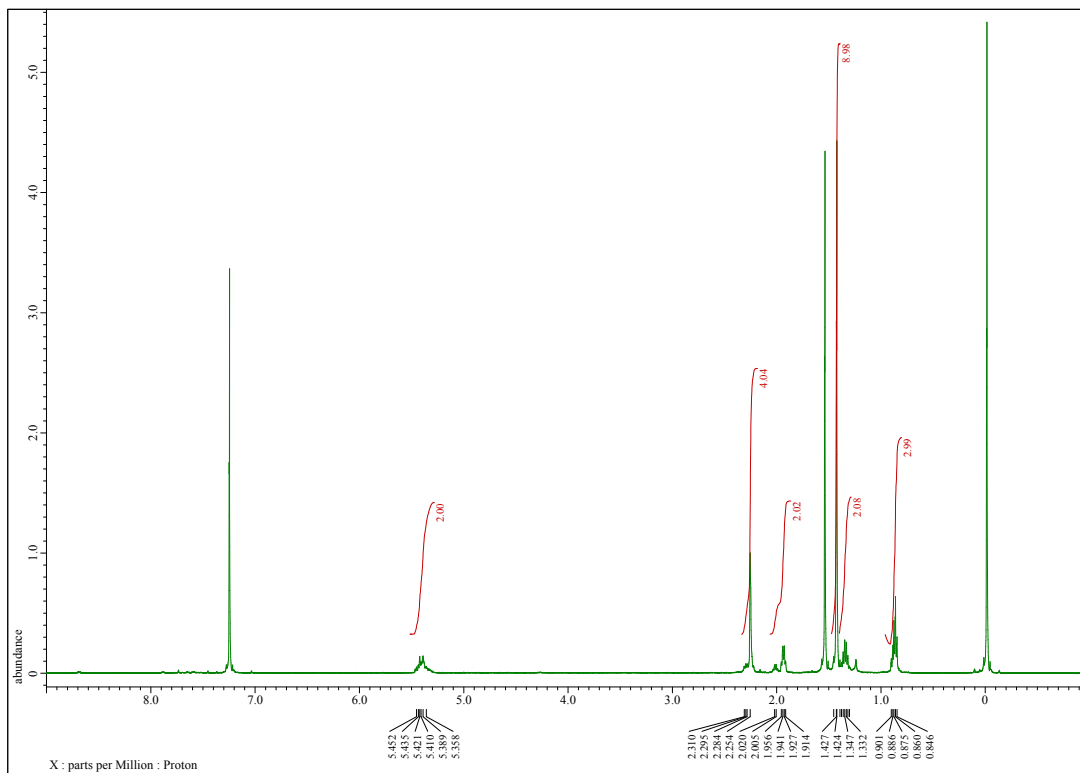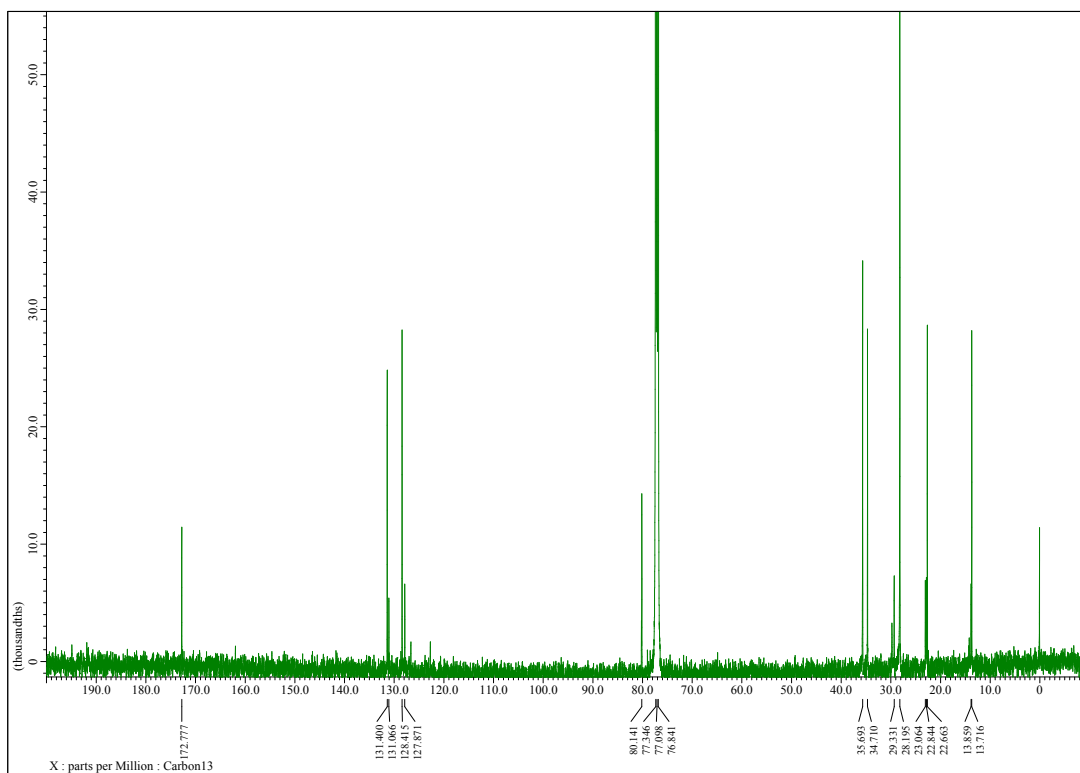

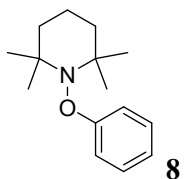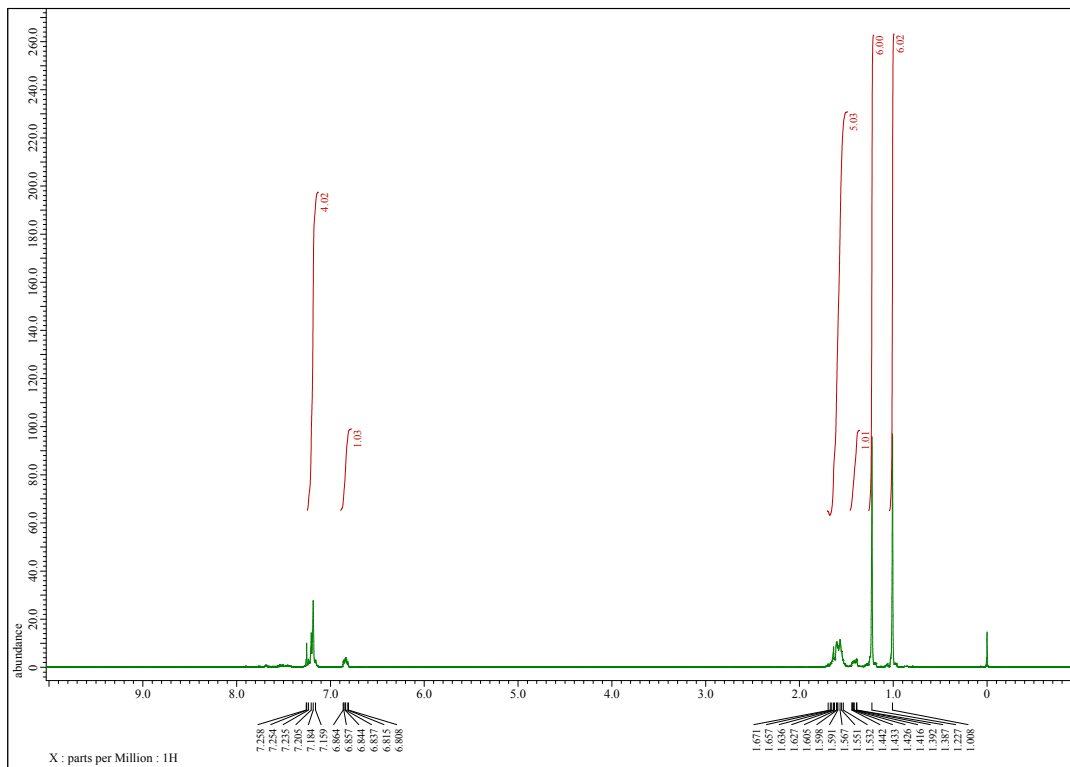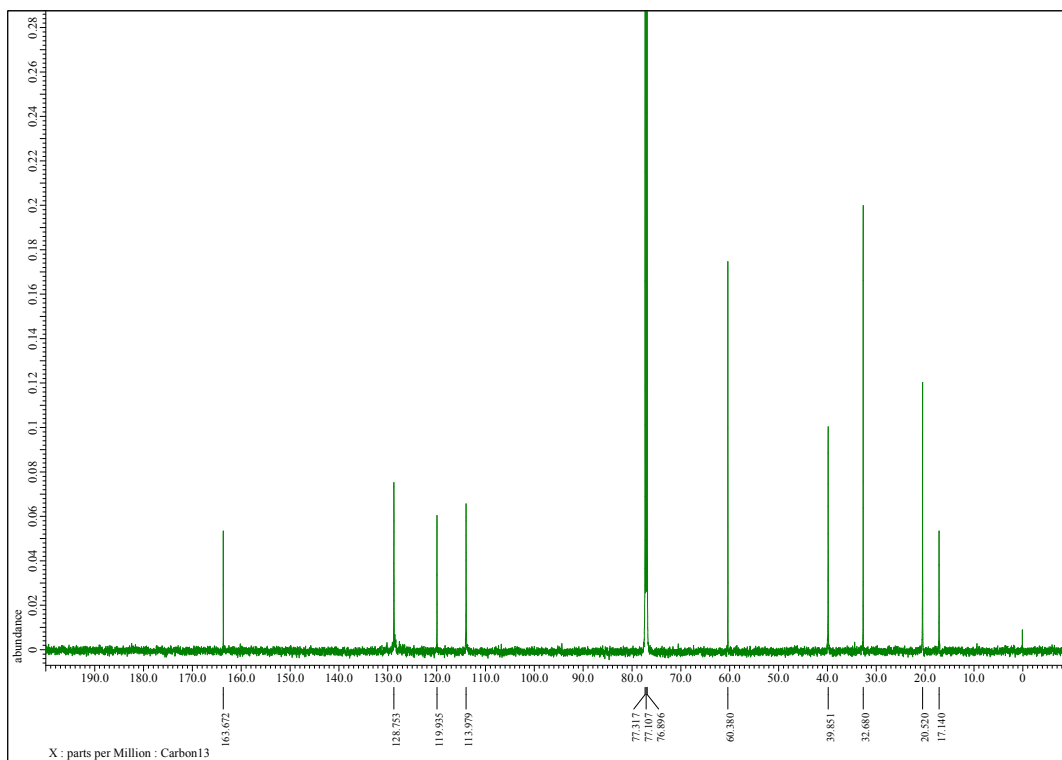

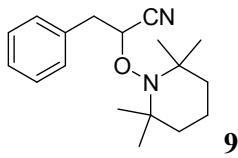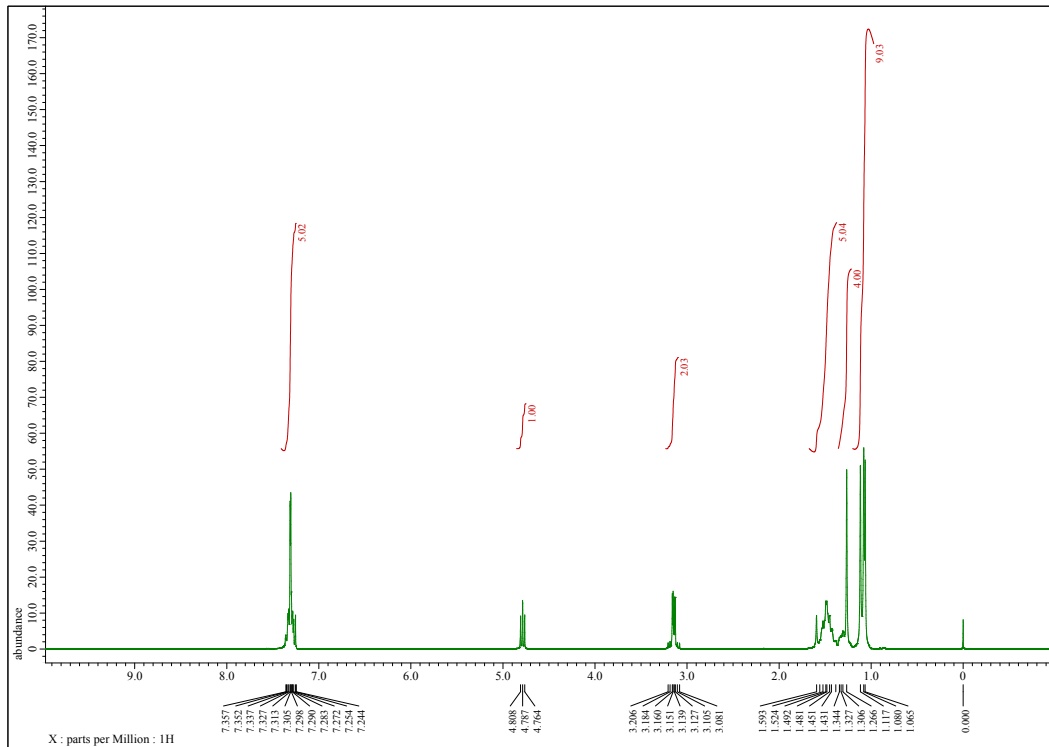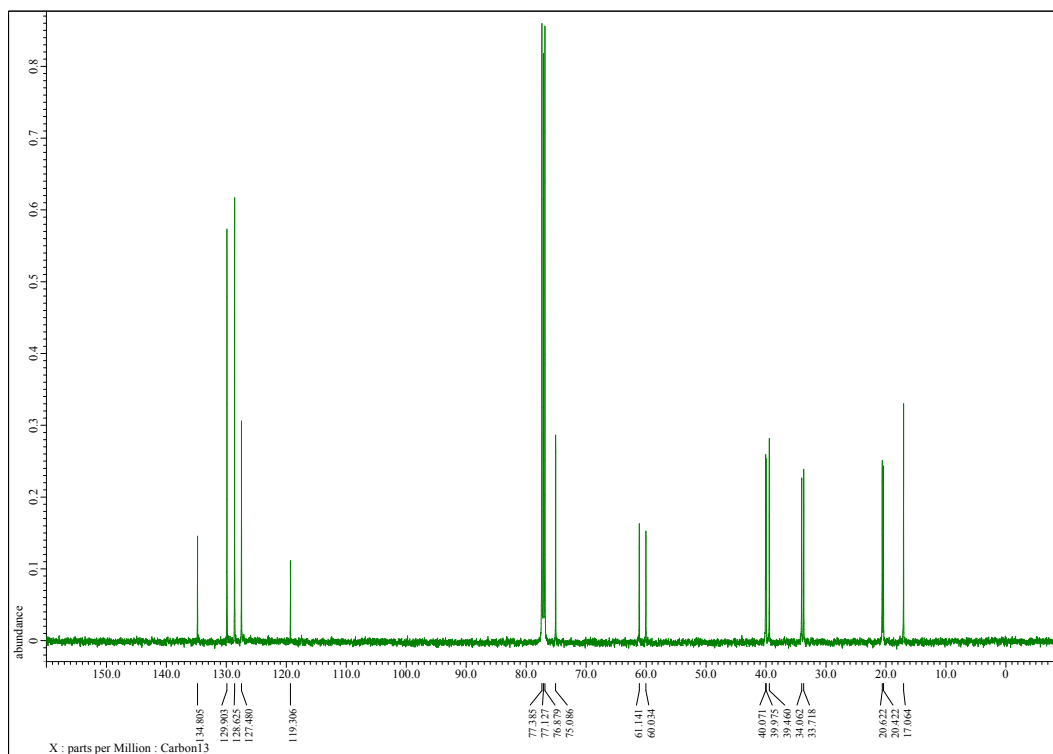

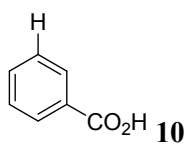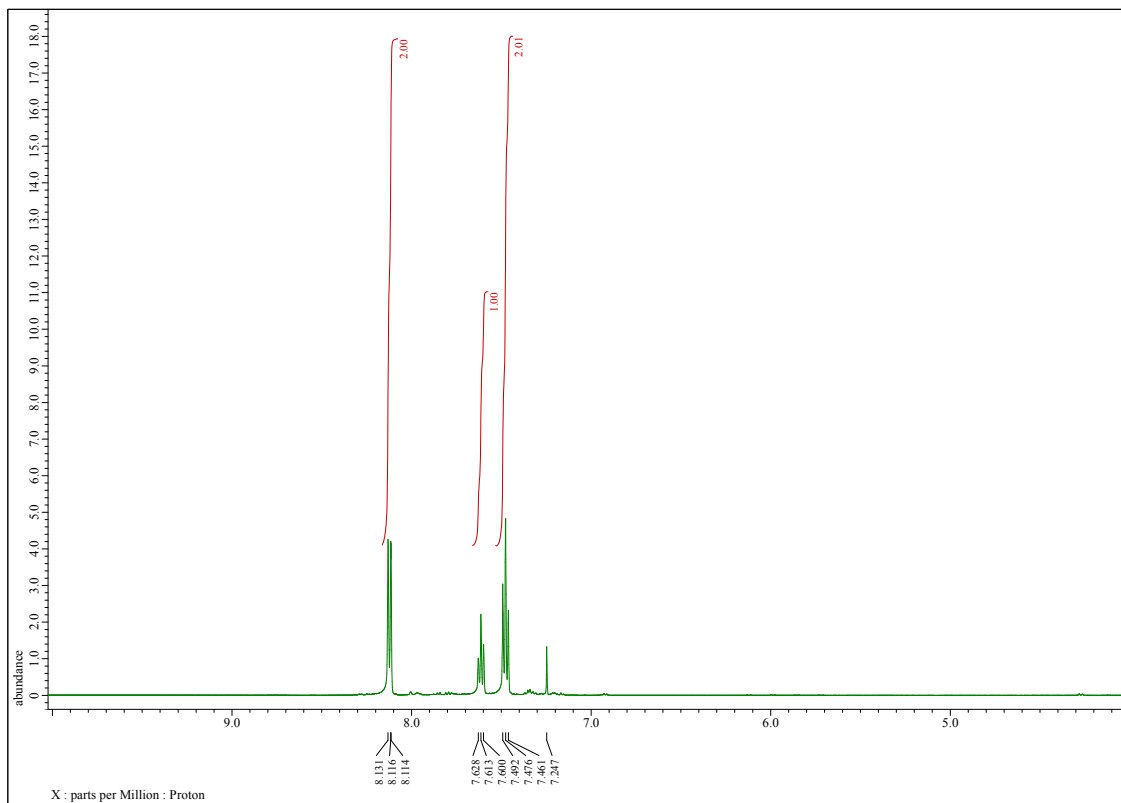

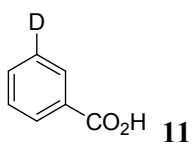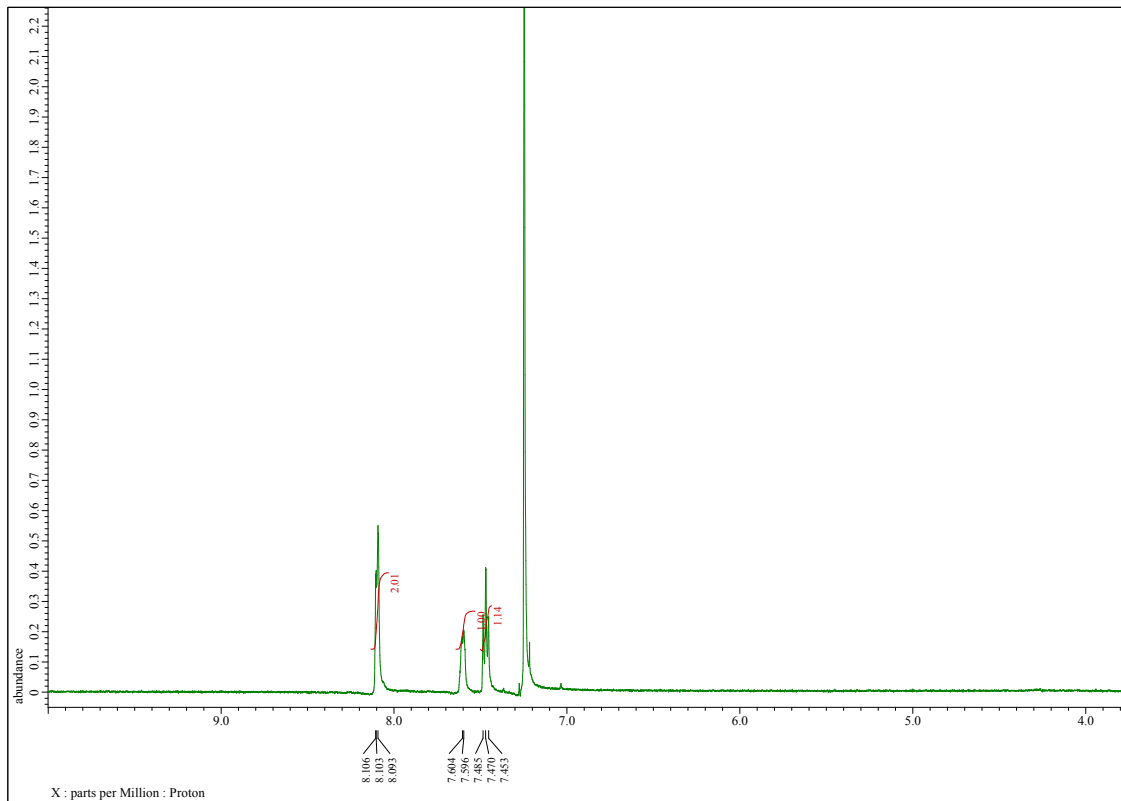

Supplement: c7cc09140k1.pdf [file c7cc09140k1.pdf]
